# Accelerated signal propagation speed in human neocortical microcircuits

## Short title: Signal propagation in human microcircuits

Gáspár Oláh<sup>1,5†</sup>, Rajmund Lákóvics<sup>1†</sup>, Sapir Shapira<sup>2†</sup>, Yoni Leibner<sup>2</sup>, Attila Szűcs<sup>3</sup>, Éva Adrienn Csajbók<sup>1</sup>, Pál Barzó<sup>4</sup>, Gábor Molnár<sup>1\*</sup>, Idan Segev<sup>2\*</sup>, Gábor Tamás<sup>1\*</sup>

## Affiliations

<sup>1</sup> ELKH-SZTE Research Group for Cortical Microcircuits, Department of Physiology, Anatomy and Neuroscience, University of Szeged, Szeged, Hungary

<sup>2</sup> Edmond and Lily Safra center for Brain Sciences, The Hebrew University of Jerusalem, Jerusalem, Israel

<sup>3</sup> Department of Physiology and Neurobiology, Institute of Biology, Eötvös Loránd University, Budapest, Hungary

<sup>4</sup> Department of Neurosurgery, University of Szeged, Szeged, Hungary

<sup>5</sup> Current affiliation: Laboratory of Cellular Neurophysiology, ELKH, Institute of Experimental Medicine, Budapest, Hungary

†: These authors contributed equally.

\*: Equal contribution of senior authors, correspondence: [gtamas@bio.u-szeged.hu](mailto:gtamas@bio.u-szeged.hu)

## Abstract

Human-specific cognitive abilities depend on information processing in the cerebral cortex, where neurons are significantly larger and sparser compared to rodents. We found that, in synaptically-connected layer 2/3 pyramidal cells (L2/3 PCs), soma-to-soma signal propagation delay is similar in humans and rodents. Thus, to compensate for the increase in neurons' size, membrane potential changes must propagate faster in human axons and/or dendrites. Dual somato-dendritic and somato-axonal patch recordings show that action potentials (APs) propagation speed is similar in human and rat axons, but the forward propagation of the EPSPs and the back-propagating APs are ~ 26 and 47% faster in human dendrites respectively. Faithful biophysical models of human and rat L2/3 PCs, combined with pharmacological manipulations of membrane properties, showed both the larger diameter of the apical dendrite and the larger conductance load imposed by the basal tree in human, combined with differences in cable properties, underlie the accelerated signal propagation in human cortical circuits.

36  
37  
38  
39  
40  
41  
42  
43  
44  
45  
46  
47  
48  
49  
50  
51  
52  
53  
54  
55  
56  
57  
58  
59  
60  
61  
62  
63  
64  
65  
66  
67  
68  
69  
70  
71  
72  
73  
74  
75  
76  
77  
78  
79  
80  
81  
82  
83  
84

## Introduction

The human neocortex is thought to be one of the most complex biological structures yet most of our knowledge regarding the properties of individual cortical neurons and their synapses is based on experiments performed in model organisms. Recent findings in human specimens indicated the emergence of new cell types in the human neocortex<sup>1-5</sup> and species related differences in transmitter release probability<sup>6</sup>, regenerative dendritic events<sup>7-9</sup>, ion channel composition of the dendrites<sup>10</sup>, temporal dynamics of synaptic potentiation<sup>11</sup> and activity patterns of the microcircuits<sup>12-14</sup>. Pioneering experiments indicate that human dendrites could evolve in ways favoring mechanisms not yet found in other species<sup>7,9</sup> and might contribute to the apparent efficacy of human cognitive performance<sup>15</sup>. Functional differences are accompanied by a divergence in morphological features, ranging from general alterations in the thickness of cortical layers to increasing complexity in anatomical properties of classical cell types<sup>5,16</sup>. Human pyramidal cells with larger and more extensively branching dendritic trees have an opportunity to receive higher number of synaptic inputs<sup>17,18</sup>. This, when combined with the increase morphological complexity, endows human cortical neurons with enhanced computational and encoding capabilities<sup>5,8</sup>.

However, the increase in size of dendrites and axons might come with a cost of longer signal propagation times of both synaptic potentials in dendrites (larger dendritic delay) as well as action potentials in axons (axonal delay). This will slow down information processing, both within individual cortical neurons as well as in respective cortical circuits<sup>19,20</sup>. Indeed, transferring large amounts of information within and between brain regions in a short amount of time, and the capability of the neuronal circuit to respond sufficiently fast to its environment, is an important evolutionary function of neuronal networks<sup>20,21</sup>. Increased cell-to-cell delay will also affect plasticity/learning processes that depend on the timing between the pre- and the post-synaptic action potentials, e.g., the spike-timing-dependent plasticity (STDP) mechanism. It was therefore suggested that certain scaling morphological rules must be applied so that animals with larger brains can still function adequately in their environment<sup>22</sup>. Is that the case for cortical neurons in human?

We set out in this study to directly measure the speed of signal propagation in both dendrites and axons of individual human and rat L2/3 pyramidal cells and applied experiments-based models to identify cellular and subcellular properties involved in controlling neuron-to-neuron propagation delays. Our integrative experimental and modeling study provides insights into the scaling rules that enable to preserve information processing speed albeit the much larger neurons in the human cortex.

## Results

### *Signal propagation paths and delays in human and rat pyramid to pyramid connections*

We followed recent results indicating differences in the density and size of human and mouse supragranular pyramidal cells (PCs)<sup>4</sup> in a human-rat setting. As expected, measurements on 3D reconstructions based on randomly selected, electrophysiologically recorded and biocytin filled human (n = 30) and rat (n = 30) L2/3 cortical pyramidal cells (Fig. S1A) show significant differences in the horizontal ( $463.17 \pm 119.48$  vs.  $324.79 \pm 80.58$   $\mu\text{m}$ , *t* test:  $P = 1.687 \times 10^{-6}$ ) and vertical extensions ( $542.58 \pm 146.89$  vs.  $409.99 \pm 102.69$   $\mu\text{m}$ , *t* test:  $P = 0.00013$ ), and in the total dendritic ( $9054.94 \pm 3699.71$  vs.  $5162.68 \pm 1237.71$   $\mu\text{m}$ , *t* test:  $P = 7.203 \times 10^{-7}$ ) and apical dendritic length ( $4349.76 \pm 1638.39$  vs.  $2592.15 \pm 818.26$   $\mu\text{m}$ , *t* test:  $P = 1.638 \times 10^{-6}$ , Fig. S1B,C).

85 To examine the temporal aspects of information propagation in excitatory microcircuits, we  
86 performed simultaneous whole cell patch clamp recordings in synaptically connected L2/3 PCs  
87 from acute neocortical slices from rat and human tissues (Fig. 1). Excitatory postsynaptic potentials  
88 (EPSPs) were measured in response to single action potentials (AP) in presynaptic cells (Fig. 1B).  
89 Synaptic latency was calculated as the time difference between the peak of the presynaptic AP and  
90 the onset point of the postsynaptic EPSP (see Fig 1B and Methods). We did not find significant  
91 differences in synaptic latencies between human and rat PC-to-PC connections (rat:  $1.126 \pm 0.378$   
92 ms, rat: n=19, human:  $1.111 \pm 0.306$  ms, n=17, Mann-Whitney test: P=0.949). Both pre- and  
93 postsynaptic PCs were filled with biocytin during recordings allowing for post hoc identification of  
94 close appositions between presynaptic axons and postsynaptic dendrites<sup>23</sup> (Fig. 1A). We measured  
95 the shortest axonal path lengths linking the presynaptic soma to close appositions on the  
96 postsynaptic dendrite (rat:  $168.267 \pm 49.59$   $\mu$ m, human:  $272.22 \pm 73.14$   $\mu$ m) and the shortest  
97 dendritic path lengths from close appositions found exclusively on dendritic spine heads to the  
98 postsynaptic soma (rat:  $84.9 \pm 18.301$   $\mu$ m, human:  $129.48 \pm 40.005$   $\mu$ m) in a subset of recordings  
99 (rat: n = 6, human: n = 5). Consequently, we found that the minimal intersomatic distance (the sum  
100 of the shortest axonal and dendritic paths) in each synaptically connected PC-to-PC pair was  
101 significantly smaller in rats compared to humans (rat:  $259.7 \pm 58.8$   $\mu$ m, human:  $402.12 \pm 74.757$   
102  $\mu$ m, Mann-Whitney test: P = 0.009, Fig. 1D). We did not find significant difference in these paired  
103 recordings in synaptic latency (rat:  $1.09 \pm 0.375$  ms, n = 6 from n = 6 rats; human:  $1.102 \pm 0.408$   
104 ms, n = 5 from n = 5 patients; Mann-Whitney test: P=0.931, Fig. 1C, darker dots). Given that similar  
105 synaptic latencies accompany different lengths for signal propagation in the two species, membrane  
106 potentials (APs and/or EPSPs) are likely to propagate faster in human PC-to-PC connections.

### 107 *Direct measurements of signal propagation in PC dendrites and axons*

108 Compensation of longer axonal and dendritic paths must be explained by higher velocity of signal  
109 propagation along axons and/or dendrites. We therefore asked whether interspecies differences can  
110 be found in axonal and/or dendritic signal propagation in L2/3 PCs.

111 First, we investigated whether we could find dissimilarities between the two species in the speed of  
112 signal propagation along axons of PCs. We whole cell recorded the soma and a distal axon  
113 simultaneously, positioning the axonal recording electrode on one of the blebs formed at the cut  
114 ends of axons during slice preparation. Somatic current injections were used to trigger APs and the  
115 time between somatic and the axonal AP was measured (Fig. 2A). We captured two-photon images  
116 during electrophysiological recording and measured the length of the axonal path from the somatic  
117 to the axonal electrode on image z-stacks. The dataset was restricted to recordings that matched the  
118 distances from the soma to axo-dendritic close appositions determined above along the axon of  
119 synaptically coupled PC-to-PC connections (rat: n = 8,  $268.203 \pm 76.149$   $\mu$ m vs. human: n = 9,  
120  $281.507 \pm 125.681$   $\mu$ m, two sample *t* test: P = 0.799, Fig. 2F). The latency between the soma and  
121 the axon bleb of the propagating AP peaks was not significantly different between the species (rat:  
122 n = 8,  $0.333 \pm 0.211$  ms vs. human: n = 9,  $0.327 \pm 0.123$  ms, two sample *t* test: P = 0.945). The  
123 axonal speed of AP propagation was calculated for each cell from the time required from soma to  
124 recording site. We did not find significant difference the propagation speed of APs in the axons of  
125 rat and human (rat: n = 8,  $0.848 \pm 0.291$  m/s vs. human: n = 9,  $0.851 \pm 0.387$  m/s, two sample *t*-  
126 test: P = 0.282, Fig. 2F). Our axonal recordings suggest that there is no significant difference  
127 between the two species over the range of distances we investigated, so the lower latencies in the  
128 paired recordings may be due to dendritic differences.

129 So, we next sought to test rat and human dendritic signal propagation velocity using simultaneous  
130 whole cell patch clamp recordings with electrodes placed on the somata and dendritic shafts of PCs.  
131 Distances of somatic and dendritic recording locations (rat:  $143.078 \pm 72.422$   $\mu$ m, n = 46; vs.

132 human:  $153.446 \pm 57.698 \mu\text{m}$ ,  $n = 62$ , Mann-Whitney test:  $P = 0.175$ , Fig.2B) were chosen to be  
133 similar in the two species and in range of soma-to-dendrite distances of axo-dendritic close  
134 appositions determined above for synaptically coupled PC-to-PC connections. In the first set of  
135 experiments, we injected suprathreshold current through the somatic electrode and measured the  
136 time difference between the evoked AP peak at the soma and the respective backpropagating AP  
137 peak in the dendritic electrode (Fig. 2E and F). We found significant difference in the signal  
138 propagation time between rat and human PCs (rat:  $0.672 \pm 0.334 \text{ ms}$ ,  $n = 46$ ; vs. human:  $0.495 \pm$   
139  $0.229 \text{ ms}$ ,  $n = 62$ , Mann-Whitney test:  $P = 0.005$ , Fig. 2F). The AP propagation speed was calculated  
140 for each cell from the time difference between the somatic and dendritic APs divided by the distance  
141 between the two points. We found that the propagation speed was, on average,  $\sim 1.47$ -fold faster in  
142 human (rat:  $0.233 \pm 0.095 \text{ m/s}$  vs. human:  $0.344 \pm 0.139 \text{ m/s}$ , Mann-Whitney test:  $P = 6.369 \times 10^{-6}$ ,  
143 Fig. 2F). In a second set of experiments, using the same dual recording configuration, we tested  
144 orthodromic or forward propagating signal propagation velocity by injecting simulated EPSP  
145 (sEPSP) signals in the dendrites and recorded the resultant subthreshold voltage response in the  
146 soma (Fig. 2C). These experiments were performed in the same PCs where backpropagating AP  
147 velocities were also measured (rat:  $n = 24$ , human:  $n = 24$ ). We found that sEPSP propagation speed  
148 was, on average,  $\sim 1.26$ -fold faster in human (rat:  $0.074 \pm 0.018 \text{ m/s}$  vs. human:  $0.093 \pm 0.025 \text{ m/s}$ ,  
149 two sample  $t$  test:  $P = 0.004$ ; Fig. 2D). In addition, we found correlation between forward  
150 propagating sEPSP speed and back propagating AP speed (Pearson correlation coefficient,  $r =$   
151  $0.396$ ,  $P = 0.005302$ , Fig. 2D).

## 152 **Contribution of ion channels of the dendritic membrane to signal propagation velocity**

153 Hyperpolarization-activated cyclic nucleotide-modulated (HCN) channel densities were shown to  
154 be higher in human compared to rat layer 2/3 PCs and were shown to be instrumental in more  
155 depolarized resting membrane potentials and in larger sag potentials in response to  
156 hyperpolarization in the human<sup>10</sup>. In addition, modeling predicted that signal delay in dendrites  
157 reduces with increased h-conductance<sup>10</sup>. In line with previous studies, human PCs in our dataset  
158 had more depolarized resting membrane potential (rat:  $-70.49 \pm 5.78 \text{ mV}$ , human:  $-64.30 \pm 7.28$   
159  $\text{mV}$ , Mann-Whitney U test:  $P = 7.37 \times 10^{-6}$ , Fig. S2A) but the average somatic input resistance were  
160 not significantly different in the two species (rat:  $59.56 \pm 21.86 \text{ M}\Omega$ ,  $n = 46$ , human:  $71.375 \pm$   
161  $65.485 \text{ M}\Omega$ ,  $n = 62$ , Mann-Whitney test:  $P = 0.347$ , Fig. S2A).

162 Based on the correlation found between forward-propagating sEPSP speed and back-propagating  
163 AP speed, we performed pharmacological experiments on bAPs (since it is technically less  
164 challenging to evoke) to uncover potential contributors to increased dendritic speeds in humans. To  
165 test the contribution of h-channels to the elevated signal propagation speed in human dendrites, we  
166 performed pharmacological experiments with  $20 \mu\text{M}$  ZD7288, a specific blocker of h-channels.  
167 Significant hyperpolarization of the resting membrane potential was observed in the human cells  
168 but not in the rat neurons (Fig. S2B) and significantly increased input resistance accompanied drug  
169 application in both human and rat neurons (Fig. S2C). Drug application significantly decreased bAP  
170 propagation speed in human PCs (control:  $0.322 \pm 0.073 \text{ m/s}$ , ZD7288:  $0.268 \pm 0.066 \text{ m/s}$ ,  $n = 8$ ,  
171 paired  $t$  test:  $P = 0.022$ , Fig. 3B) but not in rat PCs (control:  $0.163 \pm 0.054 \text{ m/s}$ , ZD7288:  $0.149 \pm$   
172  $0.057 \text{ m/s}$ ,  $n = 9$ , paired  $t$  test:  $P = 0.062$ , Fig. 3A). Along the same vein, changes in bAP propagation  
173 speed were higher in the human cells (rat:  $-0.014 \pm 0.019 \text{ m/s}$ , human:  $-0.054 \pm 0.052 \text{ m/s}$ , two-  
174 sample  $t$  test:  $P = 0.048$ , Fig. 3C) in response to h-channel blockage. It can therefore be argued that  
175 HCN channels may contribute to the higher conduction velocities in human dendrites, but do not  
176 by themselves explain the differences between the two species.

177 Back-propagation of APs is an active process supported by voltage gated ion channels that can  
178 initiate regenerative events in the dendrites<sup>24</sup>. To further investigate the influence of voltage gated



179 ion channels we pharmacologically blocked voltage gated  $\text{Na}^+$  channels with tetrodotoxin (TTX,  
180  $1\ \mu\text{M}$ ), voltage gated  $\text{Ca}^{2+}$  channels with cadmium chloride ( $\text{CdCl}_2$ ,  $200\ \mu\text{M}$ ), and NMDA receptors  
181 with (2R)-amino-5-phosphonovaleric acid (AP5,  $20\ \mu\text{M}$ ) simultaneously. Since the blockage of  
182 voltage gated  $\text{Na}^+$  channels prevent the initiation of APs, we kept the soma of the recorded cells in  
183 voltage clamp mode and used a prerecorded template as voltage command through a somatically  
184 placed electrode (the so called “simulated spike”) and measured the back propagation of the  
185 response to the somatic voltage command at a dendritic recording site in current clamp mode. As  
186 expected, the amplitude of the bAPs at the dendritic recording site dropped significantly in human  
187 and rat cells respectively (Fig. S2D). The speed of back propagation of membrane potential signals  
188 in dendrites turned “passive” by the pharmacological cocktail was significantly lower compared to  
189 drug-free control both in rat and human samples (rat control:  $0.199 \pm 0.053\ \text{m/s}$ , rat  
190 TTX/ $\text{CdCl}_2$ /AP5:  $0.076 \pm 0.03\ \text{m/s}$ , paired  $t$  test:  $P = 2.099 \times 10^{-5}$ , human control:  $0.395 \pm 0.14\ \text{m/s}$ ,  
191 human TTX/ $\text{CdCl}_2$ /AP5:  $0.184 \pm 0.061\ \text{m/s}$ , Wilcoxon signed ranks test:  $P = 0.016$ , Fig. 3D,E).  
192 The human dendrites made “passive” by the cocktail retained higher bAP propagation speed (rat:  
193  $0.076 \pm 0.03\ \text{m/s}$   $n = 8$ , human:  $0.184 \pm 0.061\ \text{m/s}$   $n = 8$ , Mann-Whitney test:  $P = 0.001$  Fig. 3F).  
194 Taken together, when searching for factors contributing to higher signal propagation speeds in  
195 human compared to rat pyramidal dendrites, passive properties seem to have a major role in  
196 differentiating the two species and these are supplemented by minor contribution from HCN  
197 channels having different densities in human vs. rat.

## 198 **Specific membrane capacitance**

199 The specific membrane capacitance ( $C_m$ ) can influence the time constant of the biological  
200 membrane, and it is a key determinant of the propagation of electrical signals. Recent experiments  
201 indicated that the  $C_m$  of human L2/3 PCs might be significantly lower compared to rodents<sup>25</sup> and  
202 modeling studies suggested that the decrease in  $C_m$  could lead to increased conduction speed and  
203 fewer synapses being able to evoke suprathreshold events in human PCs<sup>25</sup>. However, a separate  
204 line of experiments could not detect differences in the  $C_m$  of L5 PCs between humans and rodents  
205<sup>7</sup>, or L2/3 PCs<sup>26</sup> thus, to test whether  $C_m$  is a component in producing elevated signal propagation  
206 velocity in human dendrites, we directly measured the  $C_m$  values of human and rat PCs by pulling  
207 nucleated patches<sup>25</sup> (Fig. 4A,B). We found no significant difference in the  $C_m$  between the human  
208 and rat L2/3 PCs (rat:  $1.092 \pm 0.14\ \mu\text{F}/\text{cm}^2$   $n = 20$ ; human:  $0.987 \pm 0.196\ \mu\text{F}/\text{cm}^2$   $n = 19$ , two-  
209 sample  $t$  test:  $P = 0.0615$ , Fig. 4C). The specific membrane capacitance is determined by the  
210 dielectric constant of the membrane, and it is inversely proportional with the membrane thickness.  
211 We measured the membrane thickness of dendritic structures with transmission electron  
212 microscopy both in human and rat samples (Fig. 4D,E) and detected no significant differences  
213 between the two species (human:  $4.271 \pm 0.873\ \text{nm}$ ,  $n = 213$  from  $n = 3$  patient; rat:  $4.122 \pm 0.779$   
214  $\text{nm}$   $n = 151$  from  $n = 3$  rat, Mann-Whitney test:  $P = 0.212$ , Fig. 4E). Based on these experiments it  
215 seems that not the specific membrane capacitance is the key determinant of the higher signal  
216 propagation speed in human cells.

## 217 **Effect of dendritic thickness**

218 Our simultaneous soma-dendritic and soma-axonal recordings suggest that dendritic  
219 properties have significant contribution to interspecies differences in signal propagation velocity.  
220 Anatomical features of neuronal processes have a major influence on signal propagation properties  
221<sup>5,19</sup>, thus, in addition to the soma-dendritic path measurements shown above, we also measured the  
222 thickness of dendrites at every  $0.5\ \mu\text{m}$  along the path linking the somatic and dendritic electrodes  
223 on two-photon image stacks captured during electrophysiological measurements (Fig. 5A-C). We  
224 found that the mean diameter of dendrites was thicker in human ( $n = 62$ ,  $2.272 \pm 0.584\ \mu\text{m}$ )  
225 compared to the rat ( $n = 46$ ,  $2.032 \pm 0.413\ \mu\text{m}$ , two sample  $t$  test:  $P = 0.019$ , Fig. 5D). Moreover,

226 in samples where we acquired both dendrite thickness and bAP signal propagation velocity, we  
227 found that the mean dendritic diameter between the recording sites was correlated with the speed  
228 of backpropagating APs (Fig. 5E).

### 229 **Modeling EPSP propagation in dendrites**

230 Detailed compartmental models were utilized to disassemble the effect of various morphological  
231 and cable parameters on the latency and velocity of synaptic potential in human and rat L2/3  
232 dendrites. Based on the 3D morphological reconstructions of five human and four rat PCs, we first  
233 asked, how morphological differences *per se* affect signal propagation, assuming that the cable  
234 parameters are identical in all cells ( $C_m = 1 \mu F/cm^2$ ,  $R_m = 15,000 \Omega cm^2$ ,  $R_a = 150 \Omega cm$ , Fig. 6). Figure  
235 6A,B shows EPSPs latency (and velocity) as a function of the distance from its dendritic initiated  
236 site and the soma. Latency was calculated as the time difference between local dendritic EPSP peak-  
237 time and the resulting EPSP peak-time at the soma. For the cable parameters used, the latency  
238 ranges between 0.1 - 13 ms for the rats (red circles) and between 0.01 - 25 ms in humans (blue).  
239 The respective velocity, calculated by dividing the distance of the dendritic site of EPSP origin  
240 from soma by its latency, ranged between 0.01 - 0.48 m/s for rat and 0.02 - 0.09 for human.  
241 Obviously, these differences are expected due to the difference in the total dendritic length between  
242 the two species, which are about 2-folds longer in humans. However, when focusing on the  
243 (identical) range of distances in which the experiments were performed (rectangle at lower left) we  
244 found that, for an identical physical distance from the soma, EPSPs the latency is still shorter and  
245 the velocity is larger in human compared to rat (Fig. 6B,C).

246 To further validate these results, we computed the mean latency as a function of distance from the  
247 soma, averaged over the latency across different branches at a given distance from the soma (lower  
248 right inset). Indeed, the latency is larger in rat versus human. For example, at a distance of 288  $\mu m$   
249 from the soma, the average latency in rat neurons was about 6.2 ms and only 4.1 ms in humans.  
250 When comparing the EPSPs velocity, it ranges between 0.04 - 0.24 m/s in human versus 0.026 -  
251 0.085 m/s in rat (Fig. 6B), with higher velocity in human compared to rats for every respective  
252 distance point (Fig. 6B, inset).

253 A possible reason for the smaller latency and larger velocity of EPSPs in human apical dendrites is  
254 that they are thicker than in rats (Figs. 5D and Fig. 6C. see also refs. <sup>27,28</sup>). Theory shows that, for  
255 an infinitely long cylindrical cable, the velocity of passive signals is fast near their site of origin,  
256 converging to a value of  $2\lambda/\tau$  away from the initiation point <sup>27,28</sup>. This means that the velocity (in  
257 units of  $\lambda$  and  $\tau$ ) of passive signals is identical for different cells' diameters, if one normalizes the  
258 physical distance,  $x$ , by  $\lambda$  (which is  $\propto \sqrt{d}$ , where  $d$  is the cable diameter) (see Fig. S4). Hence, in  
259 experimentally reconstructed cell morphologies, assuming that the thicker diameter in human  
260 neurons is the main contributor to their respective enhanced velocity, we expect that the latency  
261 and velocity will fall on similar curves for all cells after normalizing the distance in  $\lambda$  units and time  
262 in  $\tau$  units (see Fig. S4).

263 In Figure 6E,F we normalized the distance in  $\lambda$  units and the time in  $\tau$  units. With these  
264 normalizations, both latency (Fig. 6D) and velocity (Fig. 6E) are highly similar within species (see  
265 insets and Discussion). Yet, albeit this normalization, the velocity is still larger and the latency is  
266 still shorter in human (compare Fig. 6D,E to Fig. 6A,B, respectively). One possibility is that this  
267 extra-effect is due to differences in the dendritic load (the boundary condition at the soma) imposed  
268 on EPSPs propagating from the apical tree towards the soma <sup>28</sup>. Indeed, the basal tree in human  
269 L2/3 PCs is significantly larger than that of rat and, consequently, a larger conductance load (larger  
270  
271  
272  
273  
274

275 “sink”) is expected in human L2/3 neurons (Fig. 6F and Fig. 8A). To our delight, we found that the  
276 remaining inter-species differences in latency and velocity diminished when, on top of the above  
277 normalization with respect to  $\lambda$ , we computationally substituted the basal tree of human neurons  
278 with that of the basal tree of rat and *vice versa* (“hybrid cells”). An example for such “hybrid cells”  
279 is depicted in Fig. 6G,H. In these cases, the basal trees of the 5 modeled human neurons were all  
280 replaced with the basal tree of “Rat4” neuron (blue dots) and the basal tree of “Rat1”, “Rat2” and  
281 “Rat3” neurons was replaced with the basal tree of “Rat4” neuron (red dots). Figure 6I depicts the  
282 case where the basal tree of “Human1” cell was replaced with that of “Rat4” (left) and *vice versa*  
283 (right). The resultant deceleration (left) and acceleration (right) of the EPSPs due to replacing the  
284 basal trees between human and rat is depicted by the color coded “latency-gram”; an exemplar  
285 EPSPs for a synaptic input site at 288  $\mu\text{m}$  from the soma (in both cases) are shown in the inset. The  
286 explanation for this surprising result is elaborated in the Discussion.

287  
288 Each of the three key passive parameters: the specific membrane resistivity and capacitance ( $R_m$ ,  
289  $C_m$ ) and the specific axial resistivity,  $R_a$ , can either exaggerate or reduce the morphological effects  
290 on signal propagation properties in dendrites. Thus, we further asked how the actual specific  
291 parameters of the various PCs studied affect signal propagation in their respective dendrites.  
292 Toward this end, we fitted cable parameters individually to each of the 9 PCs modeled. Figure 7A  
293 shows an exemplar human L2/3 PC reconstruction with the locations of the two  
294 recordings/stimulation electrodes used in the experiments for this cell. Figure 7B top shows the  
295 case where the injected current was at the dendrite (cyan); the resultant voltage is depicted below  
296 in cyan, the model fit is superimposed dark blue (D-to-S direction). The opposite (S-to-D) direction  
297 is depicted by the next three traces below. This fit enables a direct estimate of the cable parameters  
298 per cell. The results are summarized in Table 1.

299  
300 Figure 7C-F extends the simulations shown in Figure 6A,B,D,E, but with the fitted (rather than  
301 uniform) cable parameters per cell. Compared with the uniform case, the latency and propagation  
302 velocity differences between and within the two species are enhanced (compare Fig. 7C,D to Fig.  
303 6A,B). For the per cell fit, the latency ranges between 0.1 - 11 ms for rats (red) and 0.1 - 28 ms in  
304 humans (Fig 7C) and the velocity ranges between 0.02 - 0.085 m/s for rat (red) and 0.02 - 0.75 m/s  
305 in human (Fig 7D). In Figures 7E and 7F, the distance was normalized by the space and time  
306 constants calculated per cell. After normalization, both latency (Fig. 7E) and velocity (Fig. 7F) are  
307 much more similar within-species; however differences among individual cells are larger compared  
308 with Figure 6D,E where uniform cable parameters were assumed. Similar to the uniform-cable  
309 parameters results, these inter-species differences were diminished using “hybrid cells” (See  
310 Fig.S8).

311  
312 Zooming in to the experimental regime of dendritic measurements (inset) shows the smaller latency  
313 and faster velocity in human versus rat (Fig. 7C,D, respectively). Quantifying the differences  
314 between human and rat PCs within this regime (Table 2), latency of EPSPs in human PCs is 1.6  
315 times smaller on average compared to rats (3.76 ms in humans versus 6.14 ms in rats, Table 2).  
316 Whereas the average time constants of the two species are similar (11.84 ms in humans versus 10.75  
317 ms in rats, Table 2); the average cable distance from the soma at the experimentally-recorded  
318 location in the apical dendrite is 1.2 smaller in human PCs compared to that of rat ( $0.75\lambda$  in human  
319 and  $0.89\lambda$  in rats, Table 2), mostly due to the larger dendritic diameter in humans ( $0.9\mu\text{m}$  in  
320 humans versus  $0.64\mu\text{m}$  in rats at a distance of  $\sim 288\mu\text{m}$  from the soma, Table 2), but it is further  
321 emphasized due to differences in specific cable parameters between humans and rats neurons (See  
322 Suppl Table 2, as compared to the case with uniform cable parameters). Indeed, in our set of  
323 extracted cable parameters,  $R_m$  is, on average, 1.5 larger in humans (17,120 versus 11,609  $\Omega\text{cm}^2$ )  
324 whereas  $R_a$  is 1.3 time larger in human (247  $\Omega\text{cm}$  versus 197  $\Omega\text{cm}$ ) and  $C_m$  is 1.6 times smaller in

humans (0.7 versus 1.1  $\mu F/cm^2$ ; see Table 1). The effect of these differences on signal propagation in human versus rat dendrites will be elaborated in the Discussion.

Using a similar quantification, we showed that the majority of the inter-species differences arise from the conductance load differences (for uniform cable parameters). When the basal trees of the 5 human L2/3 cells was replaced by the basal tree of that of “Rat4” cell the average latency of EPSPs in human PCs increased by a factor of 1.4 (from 4.1 ms to 5.6 ms). The same manipulation for the 3 rat L2/3 cells preserved the latency on average (from 6.2 ms to 6.1ms) (See Suppl Table 2 versus Suppl Table 3). Repeating this procedure for all PC with all basal trees of the other species showed that, on average, the latency of EPSPs in rat cells with human basal tree decreased by ~2 ms and in the reverse case the latency of EPSPs were increased by about ~2 ms, while mostly not affecting this measurement within the same specie (Fig S7).

We summarize this section by noting that our theoretical effort enabled the dissection of morphological and electrical parameters that affect differences in EPSPs velocity and latency between humans versus rats L2/3 PCs’ dendrites. By first assuming uniform cable properties for all cells’ modeled (Fig. 6) we found that 4 mechanisms are responsible for the faster velocity and shorter latency in human PCs. (i) Due to the larger diameter of the apical stem dendrite in human, human synapses are electrotonically closer to the soma (and therefore have shorter distance to travel to it); (ii) Because EPSPs velocity is high near their site of origin (decreasing to  $2\lambda/\tau$  with distance from this site the electrotonically closer synapses (at a fixed physical distance) in humans results in a higher initial velocity (shorter latency) for synapses located at the same physical distance to the soma. (iii). The conductance load imposed by the extended basal tree in human PCs enhances the EPSP velocity and reduces their latency to soma (Fig. 6G-I, Fig. 8). (iv). The specific passive cable properties of human neurons favor rapid communication between apical and soma as compared to the cable properties in rat (Fig. 7 and see Discussion).

## Discussion

Emergence of data concerning conserved and divergent features of different mammalian species in the structure and function of the cerebral cortex suggest fundamental similarity across species<sup>29–31</sup> with a subset of specialized features documented in the human cortex. A number of these specialized properties, like the increase in the size of individual neurons detected early by Ramón y Cajal<sup>32</sup>, have far reaching functional consequences and here we identified some compensatory mechanisms which, in turn, are based on additional specialized features. In particular, we studied propagation velocity of both forward (axonal) and backward (dendritic) action potential, as well as of EPSPs in human and rat dendrites. Our experimentally-based models showed that the average membrane time constant of the two species is similar (~11 ms). Yet, EPSPs arising in the apical dendrite at similar distances from the soma have significantly shorter latency in humans. This results primarily from the larger diameter of the apical trunk in humans, but also from the difference in cable properties between the two species.

Detailed compartmental models of 3D reconstructed and biophysically measured L2/3 PCs of human and rat L2/3 PCs enabled us to systematically explore factors affecting EPSPs propagation velocity and latency in apical dendrites of these two species. Since the diameter of the apical dendrite is larger in human, and assuming that all specific cable parameters were identical, a synapse located in the apical tree at a given physical distance from the soma is electrotonically closer (in units  $\lambda$ ) to the soma in human cells. Consequently, the EPSP latency is expected to be shorter in human apical dendrites. This shorter cable distance of the human synapse (at a given physical distance) has an additional consequence. The velocity of the EPSP peak in dendritic cables



376 is not constant; it is faster near the synapse, converging to a constant value of  $2\lambda/\tau$  with distant from  
377 the synapse (see Fig. S4 and <sup>28</sup>). Therefore, EPSPs originated at electrotonically closer synapses  
378 fall on the faster phase of their velocity curve, implying a shorter latency to the soma. A third and  
379 significant factor affecting the propagation velocity of EPSPs towards the soma is the degree of  
380 conductance load (the boundary condition) at the soma. We found that the significantly larger basal  
381 tree in human L2/3 cells implies a larger conductance load and, as shown in Figures 6 and 8, this  
382 enhances EPSP propagation velocity and reduces synaptic latency to the soma (see also <sup>28</sup>). It is  
383 important to note that this increased conductance load (increased sink) in human L2/3 neurons (and  
384 probably also in other cortical neurons and other neuron types which are larger in human compared  
385 to rat) will enhance EPSPs originated in the basal (rather than the apical) dendrites. Finally,  
386 differences in respective specific cable parameters between human and rat also support the faster  
387 EPSPs propagation in human. We found that the membrane time constant,  $\tau$ , is  $\sim 1.1$  larger in human  
388 (Table 1 and that the average axial resistivity,  $R_a$ , is 1.3 time smaller and  $R_m$  is 1.6 larger in humans.  
389 Thus,  $\sqrt{R_m/R_a}$  is 1.44 larger in human L2/3 PCs. Taken together, and under the infinite cable  
390 assumption, differences in specific cable parameters *per se* result in enhancing EPSP propagation  
391 speed in human dendrites by a factor of  $1.44/1.1 = 1.31$ . This contribution of specific cable  
392 parameters to increase in signal velocity in human neurons can be appreciated by contrasting the  
393 case with uniform to the case with specific cable parameters (Figs. 6 and 7 and Table 2 and Suppl  
394 Table 2). Additional factors, such impedance mismatch due to local morphological irregularities at  
395 branch points and due to dendritic spines might play an additional role in affecting signal  
396 propagation speed <sup>33</sup> (Figure S5). These possibilities will be explored in a future study.

397  
398 Noteworthy here is that we found that the membrane time constant,  $\tau$ , is similar in L2/3 PCs of  
399 rodents and human implying the preservation of coincidence detection capabilities of dendrites in  
400 both species. This is important because coincidence detection in dendrites is a fundamental  
401 mechanism for a variety of plasticity mechanisms and computational functions such as directional  
402 selectivity, sound localization and expansion of the dynamic range of sensory processing <sup>34–37</sup> and  
403 see review in <sup>38</sup>.

404  
405 Multifaceted upscaling of properties found in the human microcircuit is usually considered  
406 instrumental in functional enrichment. For example, increase in the number of human supragranular  
407 pyramidal cell types compared to the mouse <sup>4,5,16</sup> might help in separating multiple tasks of parallel  
408 processing in cortical circuits in and the increased range of synaptic strength in pyramidal output  
409 contributes to increased saliency of individual excitatory cells followed by efficient network pattern  
410 generation in human <sup>6,11,14</sup>. However, increase in the size and in morphological complexity of  
411 individual neurons might not follow a simple bigger is better logic, but instead it is rather a double-  
412 edged sword when considering cellular and microcircuit level function <sup>16,19,39–42</sup>. On one hand,  
413 additional dendritic length can receive a higher number and a more diverse set of inputs contributing  
414 to circuit complexity <sup>18</sup> and sophistication of dendritic architecture has been reviewed as the site for  
415 elaborate subcellular processing <sup>5,8,9,16,31</sup>. On the other hand, signals need to propagate along a  
416 longer route through dendritic or axonal trees of increased size. Without compensatory  
417 mechanisms, textbook knowledge dictates that longer propagation times and altered waveforms of  
418 signals associate with elongated neural processes <sup>20,21,27,28</sup>. Our observation that soma-to-soma  
419 pyramidal cell synaptic latencies are similar in human and rodent strongly suggest that  
420 compensatory mechanisms evolved together with alterations in dendritic structure such as increased  
421 thickness of dendritic segments in the human compared to segments equidistant from the soma in  
422 the rat. This finding is backed up by earlier experiments showing similar soma-to-soma latencies  
423 between presynaptic pyramidal cells and postsynaptic fast spiking interneurons in human and rat <sup>6</sup>  
424 and between human and mouse pre- and postsynaptic cells overall in the neocortex <sup>43</sup>. Thus, it  
425 appears that signals connecting pyramid-to-pyramid and pyramid-to-interneuron cell pairs have an

evolutionally conserved latency and compensation provided by dendritic structure seems precise. Importantly, based on the datasets available, there is no indication of significant over/under-compensation and acceleration/deceleration of soma-to-soma propagation times.

Precision in monosynaptic latencies across species is instrumental in keeping the timeframe relatively stable for circuit plasticity. Research in animal models laid experimental and theoretical foundations and uncovered bewildering multiplicity of mechanisms explaining the induction and maintenance of plasticity in cortical microcircuits<sup>44-50</sup>. In contrast, plasticity is understudied in human samples both at the cellular and microcircuit level<sup>51,52</sup>. Spike time dependent plasticity (STDP) is based on the relative timing of pre- and postsynaptic activity<sup>53-55</sup> and the paramount feature of STDP experiments to date is that minute jitter between pre- and postsynaptic activity results in major changes in synapse strength<sup>11,56</sup>. Pioneering STDP studies in human neurons showed a wide temporal STDP window with a reversed STDP curve compared to classic results detected in rodent brain<sup>11,56</sup>. Interestingly, dendritic L-type voltage-gated calcium channels were found important in human STDP rules<sup>11</sup>, yet our results indicate that dendritic bAP speed is equally influenced by calcium channels in human and rat. However, the faster bAP propagation found here in human PCs is compatible with the shifted STDP rule switch<sup>11</sup> by allowing postsynaptic somatic action potentials to be generated later yet arriving to dendrites at the same time relative to presynaptic spikes. It remains to be established how altered cable properties reported here interact through a dynamic interplay between potentially human specific dendritic ion channel distribution and local dendritic regenerative processes in order to achieve the reversed STDP curve in human<sup>7-10,39,40</sup>.

In addition to associative plasticity, precision of synaptic delays is crucial in the generation of circuit oscillations and network synchronization. Although all known patterns of local field potentials and behavioral correlates present in the human cortex can be detected in other mammals<sup>20</sup>, fast oscillations are thought to be especially important in cognitive performance<sup>57-59</sup>. Fast population rhythms in the cerebral cortex in the gamma and high gamma range are based on alternating activation of monosynaptically coupled and reciprocally connected pyramidal cells and interneurons<sup>60,61</sup> and similar mechanisms were proposed for some forms of ripple oscillations<sup>12,13,61</sup>. The relatively small axonal distances and accordingly short axonal AP propagation latencies linking locally connected human PCs and or interneurons found here and earlier<sup>6,11-13,15,43</sup> are compatible with the frequency range of fast oscillations. Brief loop times during sequential reactivation of a subset of closely located neurons participating in fast human rhythms are helped by subcellular placement of PC-to-PC (and PC-to-fast spiking interneuron<sup>6,12</sup>) synapses on midrange dendritic segments instead of distal branches and by extremely effective glutamatergic synapses on interneurons triggering postsynaptic spikes in response to unitary input from a PC<sup>6,12</sup> in addition to accelerated human dendritic signal propagation. Indeed, latencies of monosynaptic spike-to-spike coupling in single cell triggered Hebbian assemblies characteristic to the human cortical circuit are compatible with up to ~200 Hz frequency<sup>12,13</sup>. Phasic and sequential firing of interneurons and PCs was reported in vivo during fast oscillations in humans<sup>62</sup> and single cell spiking sequences emerging during human memory formation are replayed during successful memory retrieval<sup>63</sup> similar to results pioneered in the hippocampus of rodents<sup>64-66</sup>. Our results suggest that changes in human dendritic properties contribute to cross species preservation of fast oscillation related cortical function at the local microcircuit level.

## Materials and Methods

## Experimental Design

## 475 **Slice preparation**

476 Experiments were conducted according to the guidelines of University of Szeged Animal Care and  
477 Use Committee (ref. no. XX/897/2018) and of the University of Szeged Ethical Committee and  
478 Regional Human Investigation Review Board (ref. 75/2014). For all human tissue material written  
479 consent was given by the patients prior to surgery. Human neocortical slices were sectioned from  
480 material that had to be removed to gain access for the surgical treatment of deep-brain target ( $n = 34$   
481 female and  $n = 29$  male, aged  $49 \pm 19.2$  years). Anesthesia was induced with intravenous  
482 midazolam and fentanyl (0.03 mg/kg, 1–2  $\mu$ g/kg, respectively). A bolus dose of propofol (1–2  
483 mg/kg) was administered intravenously. The patients received 0.5 mg/kg rocuronium to facilitate  
484 endotracheal intubation. The trachea was intubated, and the patient was ventilated with O<sub>2</sub>/N<sub>2</sub>O  
485 mixture at a ratio of 1:2. Anesthesia was maintained with sevoflurane at care volume of 1.2–1.5.  
486 Following surgical removal, the resected tissue blocks were immediately immersed into a glass  
487 container filled with ice-cold solution in the operating theater and transported to the  
488 electrophysiology lab. For animal experiments we used the somatosensory cortex of young adults  
489 (19–46 days of age, (P)  $23.9 \pm 4.9$ ) male Wistar rats. Before decapitation animals were anesthetized  
490 by inhalation of halothane. 320  $\mu$ m thick coronal slices were prepared with a vibration blade  
491 microtome (Microm HM 650 V; Microm International GmbH, Walldorf, Germany). Slices were  
492 cut in ice-cold (4°C) cutting solution (in mM) 75 sucrose, 84 NaCl, 2.5 KCl, 1 NaH<sub>2</sub>PO<sub>4</sub>, 25  
493 NaHCO<sub>3</sub>, 0.5 CaCl<sub>2</sub>, 4 MgSO<sub>4</sub>, 25 D(+)-glucose, saturated with 95% O<sub>2</sub> and 5% CO<sub>2</sub>. The slices  
494 were incubated in 36°C for 30 min, subsequently the solution was changed to (in mM) 130 NaCl,  
495 3.5 KCl, 1 NaH<sub>2</sub>PO<sub>4</sub>, 24 NaHCO<sub>3</sub>, 1 CaCl<sub>2</sub>, 3 MgSO<sub>4</sub>, 10 D(+)-glucose, saturated with 95% O<sub>2</sub> and  
496 5% CO<sub>2</sub>, and the slices were kept in it until experimental use. The solution used for recordings had  
497 the same composition except that the concentrations of CaCl<sub>2</sub> and MgSO<sub>4</sub> were 3 and 1.5 mM  
498 unless it is indicated otherwise. The micropipettes (3–5 M $\Omega$ ) were filled (in mM) 126 K-gluconate,  
499 4 KCl, 4 ATP-Mg, 0.3 GTP-Na<sub>2</sub>, 10 HEPES, 10 phosphocreatine, and 8 biocytin (pH 7.25; 300  
500 mOsm).

## 501 **In vitro electrophysiology**

502 Somatic whole-cell recordings were obtained at  $\sim 37^\circ\text{C}$  from simultaneously recorded PC-PC cell  
503 pairs visualized by infrared differential interference contrast (DIC) video microscopy at depths 60–  
504 160  $\mu$ m from the surface of the slice (Zeiss Axio Examiner LSM7; Carl Zeiss AG, Oberkochen,  
505 Germany), 40 $\times$  water-immersion objective (1.0 NA; Carl Zeiss AG, Oberkochen, Germany)  
506 equipped with Luigs and Neumann Junior micromanipulator system (Luigs and Neumann,  
507 Ratingen, Germany) and HEKA EPC 10 patch clamp amplifier (HEKA Elektronik GmbH,  
508 Lambrecht, Germany). Signals were digitalized at 15 kHz and analyzed with custom written scripts  
509 in Python.

510 Presynaptic cells were stimulated with a brief suprathreshold current paired pulse (800 pA, 2–3 ms,  
511 50–60 ms separation of the two pulses), derived in 10s interval. The postsynaptic cells were recorded  
512 in current-clamp recording, holding current was set to keep the cell's membrane potential around  
513  $-50$  mV. The experiments were stopped if the series resistance (R<sub>s</sub>) exceeded 25 M $\Omega$  or changed  
514 more than 20%.

515 For the dendritic recordings 20  $\mu$ M Alexa 594 was added to the internal solution of the somatic  
516 pipette and 20  $\mu$ M Alexa 488 to the internal solution of the dendritic pipette. The PCs were kept in  
517 whole cell configuration at least 10 minutes before the axon bleb or dendritic targeted recording  
518 started. Then the microscope switched to 2p mode. The fluorescent dyes of the pipette solution were  
519 excited at 850 nm wavelength with a femtosecond pulsing Ti:sapphire laser (Mai Tai DeepSee,  
520 Spectra-Physics, Santa Clara, CA). The axon blebs and the dendrites were targeted in 2p mode.  
521 After the successful seal formation, the imaging was switched off to reduce the phototoxicity in the

522 sample. All the recordings were carried out in current clamp mode. 800ms long square pulses with  
523 elevating amplitude (from -110 to 300 pA) were used to evoke APs. In some experiments the same  
524 long square injection protocol was repeated at the dendritic/axonal recording site. For measuring  
525 the forward propagation of electrical signals in dendrites, we applied either short artificial EPSC-  
526 shaped currents<sup>67</sup> or mostly ramp currents<sup>68</sup> through the dendritic pipette. 10 minutes of recording  
527 we applied different drugs or finished the recordings. At the end of the recording, we acquired a 2p  
528 Z series from the recorded dendrite. Then the pipettes were carefully withdrawn from the cells. The  
529 slices went under chemical fixation for further anatomical investigation. Due to the small diameter  
530 of the dendrites of L2/3 neurons, the dendritic pipette access resistance was  $92.43 \pm 34.29 \text{ M}\Omega$   
531 with 24.8-196.2  $\text{M}\Omega$  range<sup>9</sup>. We ran a set of computer simulations on our reconstructed neurons  
532 (both of human and rat), adding a simulated electrode with variable serial resistance values. We  
533 found that, for series resistances ranging from 40-200  $\text{M}\Omega$ , the effect of the presence of the electrode  
534 on the EPSP latencies is negligible (Suppl Fig. 12.)

535 The specific membrane capacitance recordings were carried out as described previously<sup>69</sup>. Briefly,  
536 the L2/3 PCs were whole cell patch clamped, and a gentle suction made during slow withdrawal of  
537 the pipette. The nucleus of the cells were pulled out and the voltage clamped at -70 mV. -5mV  
538 voltage steps (repeated 100 times) were applied and the capacitive transients were measured. A  
539 DIC image of the nucleus were made for calculation of the membrane surface with the following  
540 equation:

$$541 \quad (1) A = \frac{(a + b)^2 * \pi}{4}$$

542 Where a is the shorter diameter of the ellipse and b is the longer one. After the recording the nucleus  
543 was blown away and the pipette tip was pushed into a sylgard ball until the GOhm seal formed. The  
544 -5 mV voltage steps were applied again to record the residual capacitance of the system. Before the  
545 analysis we subtracted the residual capacitance from the transients.

546 Pharmacological experiments were carried out on PCs during simultaneous somatic and dendritic  
547 recordings after 10 minutes of control recording using ACSF with the following drugs: 20  $\mu\text{M}$  4-  
548 (*N*-ethyl-*N*-phenylamino)-1,2 dimethyl-6-(methylamino)pyrimidinium chloride (ZD7288) (Sigma-  
549 Aldrich), or 1  $\mu\text{M}$  TTX, 200  $\mu\text{M}$   $\text{CdCl}_2$ , and 20  $\mu\text{M}$  AP5.

## 550 **Post hoc anatomical analysis of recorded cell pairs**

551 After electrophysiological recordings, slices were fixed in a fixative containing 4%  
552 paraformaldehyde, 15% picric acid, and 1.25% glutaraldehyde in 0.1 M phosphate buffer (PB; pH =  
553 7.4) at 4°C for at least 12 hr. After several washes in 0.1 M PB, slices were cryoprotected in 10%  
554 then 20% sucrose solution in 0.1 M PB. Slices were frozen in liquid nitrogen then thawed in PB,  
555 embedded in 10% gelatin, and further sectioned into slices of 60  $\mu\text{m}$  in thickness. Sections were  
556 incubated in a solution of conjugated avidin-biotin horseradish peroxidase (ABC; 1:100; Vector  
557 Labs) in Tris-buffered saline (TBS, pH = 7.4) at 4°C overnight. The enzyme reaction was revealed  
558 by 3'3'-diaminobenzidine tetrahydrochloride (0.05%) as chromogen and 0.01%  $\text{H}_2\text{O}_2$  as an oxidant.  
559 Sections were post-fixed with 1%  $\text{OsO}_4$  in 0.1 M PB. After several washes in distilled water,  
560 sections were stained in 1% uranyl acetate, dehydrated in an ascending series of ethanol. Sections  
561 were infiltrated with epoxy resin (Durcupan, Sigma-Aldrich) overnight and embedded on glass  
562 slices. 3D light microscopic reconstructions were carried out using the NeuroLucida system with a  
563 100 $\times$  objective. The number of putative synaptic contacts were determined by searching for close  
564 appositions of presynaptic axon terminals and postsynaptic dendrites under light microscopy. The  
565 distance of the contact sites alongside the branches were measured with NeuroLucida. The  
566 intersomatic distance was calculated from the branch length from the presynaptic soma to the  
567 putative synaptic contact alongside the axon, and the length of the dendrite from the contact site to  
568 the postsynaptic soma. If there were more than one putative synapse between the cells, we took the  
569 shortest intersomatic path distance for that given cell pair.



## 570 **Electron microscopy**

571 Sample preparations for the electron microscopy were performed as described previously <sup>2,6</sup>.  
572 Briefly, digital images of serial EM sections (20 nm thickness) were taken at 64000x magnification  
573 with a FEI/Philips CM10 electron microscope equipped with a MegaView G2 camera. The  
574 membrane thickness measurements were carried out on digital images with a custom software.  
575 Briefly, postsynaptic dendritic structures were identified with the presence of postsynaptic densities  
576 (PSD) faced in front of axon terminals filled with vesicles. At least 20 nm away from the PSD,  
577 perpendicular lines were used as region interests (ROI). The intensity line profile of each ROI was  
578 calculated, and edge detection was carried out on them. The thickness was determined as the  
579 distance between the first and last point along the line profile where the gradient magnitude was  
580 larger than 50.

## 581 **Data analysis**

582 The electrophysiological recordings were analysed by custom written python scripts. First the  
583 recorded sweeps were exported with HEKA FitMaster to ascii files. The mean synaptic delay in the  
584 paired recordings was determined by the averages of the delays between the peak of single  
585 presynaptic action potentials and the onsets of the corresponding EPSPs. The onset was determined  
586 by the projection of the intersection of two linear fits on the postsynaptic signal <sup>70</sup>. The first line  
587 was fitted to the baseline 1 ms window from -0.5 to +0.5 ms of the presynaptic AP peak. The second  
588 line was fitted on the rising phase of the EPSP (5-30% of the amplitude). The time point of the  
589 crossing lines was projected back to the signal and it was used as the onset (Fig. 1B). For the forward  
590 propagation dendritic experiments the latency was calculated on an average signal. The onset of the  
591 EPSP-like waveform was determined as the onset of EPSPs in the paired recordings.

592 The bAP latency was measured at the peak of the average signal for each cell <sup>24</sup>. Only the first APs  
593 of the sweeps were averaged to avoid activity dependent Na<sup>+</sup> channel inactivation that can cause a  
594 putative modulatory effect on the signal propagation speed. For the axon bleb recordings we  
595 assumed that the axon initial segment (AIS) of the cells are 35 μm from the axon hillock <sup>71</sup>, and the  
596 APs propagate to forward (to the bleb) and backward (to the soma) at the same speed. For the  
597 correction of the AIS we used the following formula:

$$598 \quad (2) \quad v_{corr} = \frac{l}{t + (ais/l * t)}$$

599 where  $v_{corr}$  is the corrected propagation speed for AIS position,  $l$  is the axonal distance between  
600 the soma and the axon bleb,  $t$  is the latency between the two measuring point,  $ais$  is the assumed  
601 position of the AIS alongside the axon (35 μm).  
602

## 603 **Estimating passive parameters of L2/3 pyramidal cells**

604 We constructed detailed passive compartmental and cable models for five L2/3 human neurons and  
605 the four rat L2/3 neurons that were both 3D morphologically reconstructed and biophysically  
606 characterized. For each modeled neuron, we optimized the values of three key passive parameters:  
607 the specific membrane resistivity and capacitance ( $R_m$ ,  $C_m$ ) and the specific axial resistivity,  $R_a$ ,  
608 using Neuron 8.0 <sup>72</sup> principal axis optimization algorithm <sup>73,74</sup>. Optimization was achieved by  
609 minimizing the difference between experimental voltage response following hyperpolarizing  
610 current steps either to the soma or to the apical dendrite (Fig 7A,B) and the model response. When  
611 possible, experimental data was averaged over repetitions of the same stimulus.

612  
613 To account for the surface area of spines, we used the spine correction factor (F) of 1.9 and 1.5 for  
614 human and rat PCs, respectively, by multiplying  $C_m$  and dividing  $R_m$  by F in segments which are at  
615 a distance of at least 60 μm from the soma <sup>25,75</sup>. In this study we did not attempt to fit the nonlinear  
616 effect of I<sub>h</sub> of the voltage response of the cells.  
617

618 As our experimental data contains simultaneous soma-dendritic pair recordings/stimulation, we  
619 decided to fit the voltage response in one location (e.g., the soma) for the current injection in the  
620 other location (e.g., dendrites). This is a cleaner way compared to the typical case when only one  
621 recording/stimulating electrode is available, as the problem of bridge balance at the current input  
622 site does not exist in this case. As we have two recording and simulation sites, we also examined  
623 how well the model predicts the local voltage response at the injection site (Fig 7B). Analysis and  
624 simulation were conducted using Python 3.8 and visualization using matplotlib 3.15<sup>76</sup> and seaborn  
625 0.11<sup>77</sup>.

### 626 **Modeling EPSP propagation delay and velocity**

627 We used the NEURON simulator<sup>72</sup> to model the nine 3D reconstructed neurons (Fig. S6). To  
628 compute EPSP's propagation latency and velocity, we simulated EPSPs by injecting a brief  
629 transient alpha-shaped current,  $I_\alpha$ , delivered either to the soma or in various dendritic loci along the  
630 modeled apical tree.

$$631 \quad (3) I_\alpha = A \left( 1 - e^{-\frac{t}{\tau_0}} \right) - \left( 1 - e^{-\frac{t}{\tau_1}} \right)$$

632  
633  
634  
635 where  $A = 1.5$ ,  $\tau_0 = 0.25$  and  $\tau_1 = 1ms$ , resulting in EPSP peak time,  $t_{peak} = 0.5ms$  and peak current  
636 of  $I_{peak} = 1.4nA$ .

637  
638 Latency of the resultant EPSP was calculated as the difference between the EPSP peak at all  
639 dendritic branches and its resulting EPSP at the soma; using a sampling time bin of 0.01ms.  
640 Velocity was calculated as the distance of the input site from soma divided by latency between  
641 these two points. Each dot in Figures 6 and 7 is the respective value for a specific dendritic segment  
642 in a specific branch of a neuron's apical tree. For each measured feature (radius, and velocity), an  
643 inset (zoom-in) matching the experimental distance range was added. It shows the average value  
644 across dendritic branches with a given distance from the soma, as a function of distance from soma,  
645 smoothed with a rolling 10  $\mu m$  window. For normalizing the path distance of a given dendritic site  
646 to the soma in cable units, we calculated the space constant

$$647 \quad (4) \lambda = \sqrt{d \frac{R_m}{4} R_a}$$

648 for each dendritic segment (where  $d$  is the segment's diameter). We then summed up the cable  
649 lengths of all segments along the path from the dendritic location to the soma. Time was normalized  
650 by the membrane time constant  $\tau = R_m * C_m$ . Note that, for segments far enough from cable boundary  
651 conditions and stimulus location, velocity approximately equals the theoretical value of  $2\lambda/\tau$ ,<sup>28</sup> see  
652 Fig. S5). Hence, in the uniform case where all specific parameters are equal for all cell modeled  
653 (Fig 6), normalizing the distance in cable should equalize latency/velocity differences resulting  
654 from diameter differences.

655 To account for brain tissue shrinkage due to fixation, for every segment, diameter and length were  
656 scaled based on an estimation of specific neuron shrinkage (see Suppl. Table 1). To account for  
657 unequal dye spread, for a few manually picked segments, diameter value was fixed to be equal to  
658 its nearby segment (to avoid sudden diameter jump).

### 659 **Equivalent cables for human and rat L2/3 PCs**

660 "Equivalent cables" for the respective 9 modelled human and rat cells was based on Rall's cable  
661 theory<sup>78</sup>. The variable diameter,  $d_{eq}(X)$ , of this cable as seen from the soma is,

$$662 \quad (5) d_{eq}(X) = \left( \sum_j d_j(X)^{3/2} \right)^{2/3}$$

663 where  $X$  is the cable (electrotonic) distance from the soma and  $d_j(X)$  is the diameter of the  $j$ th  
664 dendrite at the distance  $X$  from that point of interest. Figure 8A shows such equivalent cables as

665 seen from the soma. The equivalent cable for the basal tree is depicted in red and for the apical tree  
666 in blue. This enables one to graphically appreciate the large difference in the conductance load  
667 (current sink) imposed by basal tree between human and rat L2/3.

### 668 **Statistical Analysis**

669 Statistical analyses were performed in Python v.3.6, using the Python packages DABEST<sup>79</sup>, scipy,  
670 numpy, matplotlib<sup>76</sup>, seaborn<sup>77</sup>, pandas, pinguin<sup>80</sup> and scikit-learn. Data presented as the mean  $\pm$   
671 s.d. Normality was tested with the Shapiro-Wilk test. For statistical analysis, t-test, Mann-Whitney  
672 U-test or Wilcoxon signed-rank test was used. Correlations were tested using Pearson's correlation,  
673 respectively. We used the Gardner-Altman estimation plot throughout this study which is a  
674 bootstrap-coupled estimation of effect sizes, plotting the data against a mean (paired mean, as  
675 indicated) difference between the left-most condition and one or more conditions on the right (right  
676 y axis), and compared this difference against zero using 5,000 bootstrapped resamples. In these  
677 estimation graphics, each black dot indicates a mean difference and the associated black ticks depict  
678 error bars representing 95% confidence intervals; the shaded area represents the bootstrapped  
679 sampling-error distribution<sup>79</sup>. Differences were accepted as significant if  $p < 0.05$ . The complete  
680 results of all the statistical analysis presented on the main and supplementary figures can be found  
681 as a supplementary table.

682

### 683 **References**

- 684 1. Oberheim, N. A. *et al.* Uniquely Hominid Features of Adult Human Astrocytes. *J.*  
685 *Neurosci.* **29**, 3276–3287 (2009).
- 686 2. Boldog, E. *et al.* Transcriptomic and morphophysiological evidence for a specialized  
687 human cortical GABAergic cell type. *Nat. Neurosci.* **21**, 1185–1195 (2018).
- 688 3. Ballesteros Yáñez, I. *et al.* Double bouquet cell in the human cerebral cortex and a  
689 comparison with other mammals. *J. Comp. Neurol.* **486**, 344–360 (2005).
- 690 4. Berg, J. *et al.* Human neocortical expansion involves glutamatergic neuron diversification.  
691 *Nature* **598**, 151–158 (2021).
- 692 5. Deitcher, Y. *et al.* Comprehensive Morpho-Electrotonic Analysis Shows 2 Distinct Classes  
693 of L2 and L3 Pyramidal Neurons in Human Temporal Cortex. *Cereb. Cortex* **27**, 5398–  
694 5414 (2017).
- 695 6. Molnár, G. *et al.* Human pyramidal to interneuron synapses are mediated by multi-  
696 vesicular release and multiple docked vesicles. *Elife* **5**, 1–12 (2016).
- 697 7. Beaulieu-Laroche, L. *et al.* Enhanced Dendritic Compartmentalization in Human Cortical  
698 Neurons. *Cell* **175**, 643–651.e14 (2018).
- 699 8. Beaulieu-Laroche, L. *et al.* Allometric rules for mammalian cortical layer 5 neuron  
700 biophysics. *Nature* **600**, 274–278 (2021).
- 701 9. Gidon, A. *et al.* Dendritic action potentials and computation in human layer 2/3 cortical  
702 neurons. *Science* **367**, 83–87 (2020).
- 703 10. Kalmbach, B. E. *et al.* h-Channels Contribute to Divergent Intrinsic Membrane Properties

- 704 of Supragranular Pyramidal Neurons in Human versus Mouse Cerebral Cortex. *Neuron*  
705 **100**, 1194–1208.e5 (2018).
- 706 11. Verhoog, M. B. *et al.* Mechanisms underlying the rules for associative plasticity at adult  
707 human neocortical synapses. *J. Neurosci.* **33**, 17197–17208 (2013).
- 708 12. Molnár, G. *et al.* Complex events initiated by individual spikes in the human cerebral  
709 cortex. *PLoS Biol.* **6**, 1842–1849 (2008).
- 710 13. Komlósi, G. *et al.* Fluoxetine (Prozac) and serotonin act on excitatory synaptic  
711 transmission to suppress single layer 2/3 pyramidal neuron-triggered cell assemblies in the  
712 human prefrontal cortex. *J. Neurosci.* **32**, 16369–16378 (2012).
- 713 14. Szegedi, V. *et al.* Plasticity in Single Axon Glutamatergic Connection to GABAergic  
714 Interneurons Regulates Complex Events in the Human Neocortex. *PLoS Biol.* **14**, 1–21  
715 (2016).
- 716 15. Goriounova, N. A. *et al.* Large and fast human pyramidal neurons associate with  
717 intelligence. *Elife* **7**, (2018).
- 718 16. Mohan, H. *et al.* Dendritic and axonal architecture of individual pyramidal neurons across  
719 layers of adult human neocortex. *Cereb. Cortex* **25**, 4839–4853 (2015).
- 720 17. Benavides-Piccione, R. *et al.* Differential Structure of Hippocampal CA1 Pyramidal  
721 Neurons in the Human and Mouse. *Cereb. Cortex* **30**, 730–752 (2020).
- 722 18. Loomba, S. *et al.* Connectomic comparison of mouse and human cortex. *Science (80-. )*.  
723 **377**, (2022).
- 724 19. Vetter, P., Roth, A. & Häusser, M. Propagation of action potentials in dendrites depends on  
725 dendritic morphology. *J. Neurophysiol.* **85**, 926–937 (2001).
- 726 20. Buzsáki, G., Logothetis, N. & Singer, W. Scaling Brain Size, Keeping Timing:  
727 Evolutionary Preservation of Brain Rhythms. *Neuron* **80**, 751–764 (2013).
- 728 21. Laughlin, S. B. & Sejnowski, T. J. Communication in neuronal networks. *Science (80-. )*.  
729 **301**, 1870–1874 (2003).
- 730 22. West, G. B., Brown, J. H. & Enquist, B. J. A general model for the origin of allometric  
731 scaling laws in biology. *Science* **276**, 122–126 (1997).
- 732 23. Frick, A., Feldmeyer, D., Helmstaedter, M. & Sakmann, B. Monosynaptic connections  
733 between pairs of L5A pyramidal neurons in columns of juvenile rat somatosensory cortex.  
734 *Cereb. Cortex* **18**, 397–406 (2008).
- 735 24. Stuart, G. J. & Sakmann, B. Active propagation of somatic action potentials into  
736 neocortical pyramidal cell dendrites. *Nature* **367**, 69–72 (1994).
- 737 25. Eyal, G. *et al.* Unique membrane properties and enhanced signal processing in human  
738 neocortical neurons. *Elife* **5**, 1–18 (2016).
- 739 26. Gooch, H. M. *et al.* High-fidelity dendritic sodium spike generation in human layer 2/3



- 740 neocortical pyramidal neurons. *Cell Rep.* **41**, 111500 (2022).
- 741 27. Jack, J. J. B., Noble, D. & Tsien, R. W. *Electric current flow in excitable cells*. (Clarendon  
742 Press , 1975).
- 743 28. Agmon-Snir, H. & Segev, I. Signal delay and input synchronization in passive dendritic  
744 structures. *J. Neurophysiol.* **70**, 2066–2085 (1993).
- 745 29. Herculano-Houzel, S. Not all brains are made the same: new views on brain scaling in  
746 evolution. *Brain. Behav. Evol.* **78**, 22–36 (2011).
- 747 30. DeFelipe, J. The evolution of the brain, the human nature of cortical circuits, and  
748 intellectual creativity. *Front. Neuroanat.* **5**, (2011).
- 749 31. Galakhova, A. A. *et al.* Evolution of cortical neurons supporting human cognition. *Trends*  
750 *Cogn. Sci.* (2022) doi:10.1016/J.TICS.2022.08.012.
- 751 32. Cajal, S. R. y. Estudios sobre la corteza cerebral humana. *Corteza Vis Rev Trim Microgr* **4**,  
752 1–63 (1899).
- 753 33. Manor, Y., Koch, C. & Segev, I. Effect of geometrical irregularities on propagation delay  
754 in axonal trees. *Biophys. J.* **60**, 1424–1437 (1991).
- 755 34. Rall, W. Theoretical significance of dendritic trees and motoneuron input-output relations.  
756 in *Neural Theory and Modeling* (ed. R. F. Reiss) 122–146 (Palo Alto: Stanford University  
757 Press, 1964).
- 758 35. Wang, S. S. H., Denk, W. & Häusser, M. Coincidence detection in single dendritic spines  
759 mediated by calcium release. *Nat. Neurosci.* **3**, 1266–1273 (2000).
- 760 36. Roome, C. J. & Kuhn, B. Simultaneous dendritic voltage and calcium imaging and somatic  
761 recording from Purkinje neurons in awake mice. *Nat. Commun.* **9**, 1–14 (2018).
- 762 37. Agmon-Snir, H., Carr, C. E. & Rinzel, J. The role of dendrites in auditory coincidence  
763 detection. *Nature* **393**, 268–272 (1998).
- 764 38. Hay, E., Gidon, A., London, M. & Segev, I. A theoretical view of the neuron as an input–  
765 output computing device. *Dendrites* 439–464 at  
766 <https://doi.org/10.1093/acprof:oso/9780198745273.003.0015> (2016).
- 767 39. Dalügge, D. & Remy, S. Human Cortical Dendrites: Stretched to Perform Better? *Cell* **175**,  
768 635–637 (2018).
- 769 40. Fişek, M. & Häusser, M. Are Human Dendrites Different? *Trends Cogn. Sci.* **24**, 411–412  
770 (2020).
- 771 41. London, M. & Häusser, M. Dendritic Computation. *Annu. Rev. Neurosci.* **28**, 503–532  
772 (2005).
- 773 42. Spruston, N., Stuart, G. & Häusser, M. Principles of dendritic integration. *Dendrites* 351–  
774 398 (2016) doi:10.1093/acprof:oso/9780198745273.003.0012.
- 775 43. Campagnola, L. *et al.* Local connectivity and synaptic dynamics in mouse and human

- 776 neocortex. *Science* (80-. ). **375**, (2022).
- 777 44. Hebb, D. O. *The Organization of Behavior. The Organization of Behavior* (John Wiley and  
778 Sons, 1949).
- 779 45. Bliss, T. & Collingridge, G. Persistent memories of long-term potentiation and the N-  
780 methyl-d-aspartate receptor. *Brain Neurosci. Adv.* **3**, 239821281984821 (2019).
- 781 46. Malenka, R. C. & Bear, M. F. LTP and LTD: An embarrassment of riches. *Neuron* **44**, 5–  
782 21 (2004).
- 783 47. Kullmann, D. M., Moreau, A. W., Bakiri, Y. & Nicholson, E. Plasticity of Inhibition.  
784 *Neuron* **75**, 951–962 (2012).
- 785 48. Debanne, D., Inglebert, Y. & Russier, M. Plasticity of intrinsic neuronal excitability. *Curr.*  
786 *Opin. Neurobiol.* **54**, 73–82 (2019).
- 787 49. Markram, H., Gerstner, W. & Sjöström, P. J. Spike-timing-dependent plasticity: a  
788 comprehensive overview. *Front. Synaptic Neurosci.* **4**, (2012).
- 789 50. Dan, Y. & Poo, M. M. Spike timing-dependent plasticity of neural circuits. *Neuron* **44**, 23–  
790 30 (2004).
- 791 51. Mansvelder, H. D., Verhoog, M. B. & Goriounova, N. A. Synaptic plasticity in human  
792 cortical circuits: cellular mechanisms of learning and memory in the human brain? *Curr.*  
793 *Opin. Neurobiol.* **54**, 186–193 (2019).
- 794 52. Chittajallu, R. *et al.* Activity-dependent tuning of intrinsic excitability in mouse and human  
795 neurogliaform cells. *Elife* **9**, 1–30 (2020).
- 796 53. Caporale, N. & Dan, Y. Spike timing-dependent plasticity: A Hebbian learning rule. *Annu.*  
797 *Rev. Neurosci.* **31**, 25–46 (2008).
- 798 54. Markram, H., Lübke, J., Frotscher, M. & Sakmann, B. Regulation of synaptic efficacy by  
799 coincidence of postsynaptic APs and EPSPs. *Science* (80-. ). **275**, 213–215 (1997).
- 800 55. Feldman, D. E. The Spike-Timing Dependence of Plasticity. *Neuron* **75**, 556–571 (2012).
- 801 56. Bi, G. Q. & Poo, M. M. Synaptic modifications in cultured hippocampal neurons:  
802 Dependence on spike timing, synaptic strength, and postsynaptic cell type. *J. Neurosci.* **18**,  
803 10464–10472 (1998).
- 804 57. Ward, L. M. Synchronous neural oscillations and cognitive processes. *Trends Cogn. Sci.* **7**,  
805 553–559 (2003).
- 806 58. Klinzing, J. G., Niethard, N. & Born, J. Mechanisms of systems memory consolidation  
807 during sleep. *Nat. Neurosci.* 2019 2210 **22**, 1598–1610 (2019).
- 808 59. Buzsáki, G. Hippocampal sharp wave-ripple: A cognitive biomarker for episodic memory  
809 and planning. *Hippocampus* **25**, 1073–1188 (2015).
- 810 60. Buzsáki, G. & Wang, X.-J. Mechanisms of Gamma Oscillations. *Annu. Rev. Neurosci.* **35**,  
811 203–225 (2012).

- 812 61. Averkin, R. G., Szemenyei, V., Bordé, S. & Tamás, G. Identified Cellular Correlates of  
813 Neocortical Ripple and High-Gamma Oscillations during Spindles of Natural Sleep.  
814 *Neuron* **92**, (2016).
- 815 62. Van Quyen, M. Le *et al.* High-frequency oscillations in human and monkey neocortex  
816 during the wake-sleep cycle. *Proc. Natl. Acad. Sci. U. S. A.* **113**, 9363–9368 (2016).
- 817 63. Vaz, A. P., Wittig, J. H., Inati, S. K. & Zaghoul, K. A. Replay of cortical spiking  
818 sequences during human memory retrieval. *Science (80-. )*. **367**, 1131–1134 (2020).
- 819 64. Wilson, M. A. & McNaughton, B. L. Reactivation of hippocampal ensemble memories  
820 during sleep. *Science (80-. )*. **265**, 676–679 (1994).
- 821 65. Skaggs, W. E. & McNaughton, B. L. Replay of neuronal firing sequences in rat  
822 hippocampus during sleep following spatial experience. *Science* **271**, 1870–1873 (1996).
- 823 66. Nádasdy, Z., Hirase, H., Czurkó, A., Csicsvari, J. & Buzsáki, G. Replay and time  
824 compression of recurring spike sequences in the hippocampus. *J. Neurosci.* **19**, 9497–9507  
825 (1999).
- 826 67. Connelly, W. M., Crunelli, V. & Errington, A. C. Passive synaptic normalization and input  
827 synchrony-dependent amplification of cortical feedback in thalamocortical neuron  
828 dendrites. *J. Neurosci.* **36**, 3735–3754 (2016).
- 829 68. Markram, H. & Sakmann, B. Calcium transients in dendrites of neocortical neurons evoked  
830 by single subthreshold excitatory postsynaptic potentials via low-voltage-activated calcium  
831 channels. *Proc. Natl. Acad. Sci. U. S. A.* **91**, 5207–5211 (1994).
- 832 69. Gentet, L. J., Stuart, G. J. & Clements, J. D. Direct measurement of specific membrane  
833 capacitance in neurons. *Biophys. J.* **79**, 314–320 (2000).
- 834 70. Fedchyshyn, M. J. & Wang, L. Y. Activity-dependent changes in temporal components of  
835 neurotransmission at the juvenile mouse calyx of Held synapse. *J. Physiol.* **581**, 581–602  
836 (2007).
- 837 71. Palmer, L. M. & Stuart, G. J. Site of action potential initiation in layer 5 pyramidal  
838 neurons. *J. Neurosci.* **26**, 1854–1863 (2006).
- 839 72. Hines, M. L., Davison, A. P. & Muller, E. NEURON and Python. *Front. Neuroinform.* **3**,  
840 (2009).
- 841 73. Brent, R. A new algorithm for minimizing a function of several variables without  
842 calculating derivatives. in *Algorithms for Minimization without Derivatives* 200–248 (  
843 Prentice Hall, 1976).
- 844 74. Segev, I., Fleshman, J. W. & Burke, R. E. Compartmental models of complex neurons. in  
845 *Methods in Neuronal Modeling: From Synapses to Networks* 63–96 (MIT Press, 1989).
- 846 75. Hunt, S. *et al.* Strong and reliable synaptic communication between pyramidal neurons in  
847 adult human cerebral cortex. *Cereb. Cortex* 1–22 (2022) doi:10.1093/cercor/bhac246.
- 848 76. Hunter, J. D. Matplotlib: A 2D graphics environment. *Comput. Sci. Eng.* **9**, 90–95 (2007).

- 849 77. Waskom, M. L. seaborn: statistical data visualization. doi:10.21105/joss.03021.
- 850 78. Rall, W. Branching dendritic trees and motoneuron membrane resistivity. *Exp. Neurol.* **1**,  
851 491–527 (1959).
- 852 79. Ho, J., Tunkaya, T., Aryal, S., Choi, H. & Claridge-Chang, A. Moving beyond P values:  
853 data analysis with estimation graphics. *Nat. Methods* **16**, 565–566 (2019).
- 854 80. Vallat, R. Pingouin: statistics in Python. *J. Open Source Softw.* **3**, 1026 (2018).

855

## 856 Acknowledgments

857 The authors thank Éva Tóth, Katalin Kocsis, Leona Mezei and Bettina Lehóczki for  
858 assistance in anatomical experiments, Judith Baka for providing the electron micrographs  
859 for membrane thickness measurements, Gergely Komlósi, Martin Tóth, Miklós Füle,  
860 Szabina Furdan, Szabolcs Oláh, Zoltán Péterfi for recording some neuron and Attila  
861 Ozsvár, Márton Rózsa, Martin Tóth, Ildikó Szöts, Norbert Mihut, Róbert Averkin, Sándor  
862 Bordé, Viktor Szegedi for useful feedback and suggestions. The technical help and  
863 methodical suggestions of János Szabadics, János Brunner and Viktor Oláh at the  
864 beginning of the project are appreciated. This work is dedicated to the memory of Mrs.  
865 Lily Safra, a great supporter of brain research.

866

## 867 Funding:

868 This work was supported by Eötvös Loránd Research Network grants ELKH-SZTE  
869 Agykérgei Neuronhálózatok Kutatócsoport and KÖ-36/2021 (G.T.)

870

871 Ministry of Human Capacities Hungary (20391-3/2018/FEKUSTRAT and NKP 16-3-  
872 VIII-3) (G.T.);

873

874 National Research, Development and Innovation Office grants GINOP 2.3.2-15-2016-  
875 00018, Élvonal KKP 133807, ÚNKP-20-5 - SZTE-681, 2019-2.1.7-ERA-NET-2022-  
876 00038, TKP2021-EGA-09, TKP-2021-EGA-28 (G.T.) and OTKA K128863 (G.T., G.M.)

877

878 ÚNKP-21-5-SZTE-580 New National Excellence Program of the Ministry for Innovation  
879 and Technology from the source of the National Research, Development and Innovation  
880 Fund (G.M.)

881

882 ÚNKP 16-3-VIII-3 new national excellence program of the Ministry of Human Capacities  
883 (G.O.)

884

885 János Bolyai Research Scholarship of the Hungarian Academy of Sciences (G.M.)

886

887 Hungarian Scientific Research Foundation under grant ANN-135291 (A.Sz.)

888

889 National Institutes of Health awards U01MH114812 (G.T., I.S.) and UM1MH130981  
890 (G.T.)

891

892 The Patrick and Lina Drahi Foundation, grant from the ETH domain for the Blue Brain  
893 Project, the Gatsby Charitable Foundation (I.S.).

894



895  
896  
897  
898  
899  
900  
901  
902  
903  
904  
905  
906  
907  
908  
909

**Author contributions:**

Conceptualization: GT, IS, GM, GO  
Methodology: GO, GM, RL, AS, PB, EC, SS, YL, IS, GT  
Investigation: GO, GM, RL, AS, PB, EC, SS, YL  
Visualization: GO, GM, SS  
Supervision: GM, IS, GT  
Writing—original draft: GO, SS, GM, IS, GT  
Writing—review & editing: GO, SS, GM, IS, GT

**Competing interests:** Authors declare that they have no competing interests.

**Data and materials availability:** All data, code, and materials used in the analyses is available upon request following publication.

## Figure legends and Tables

910  
911

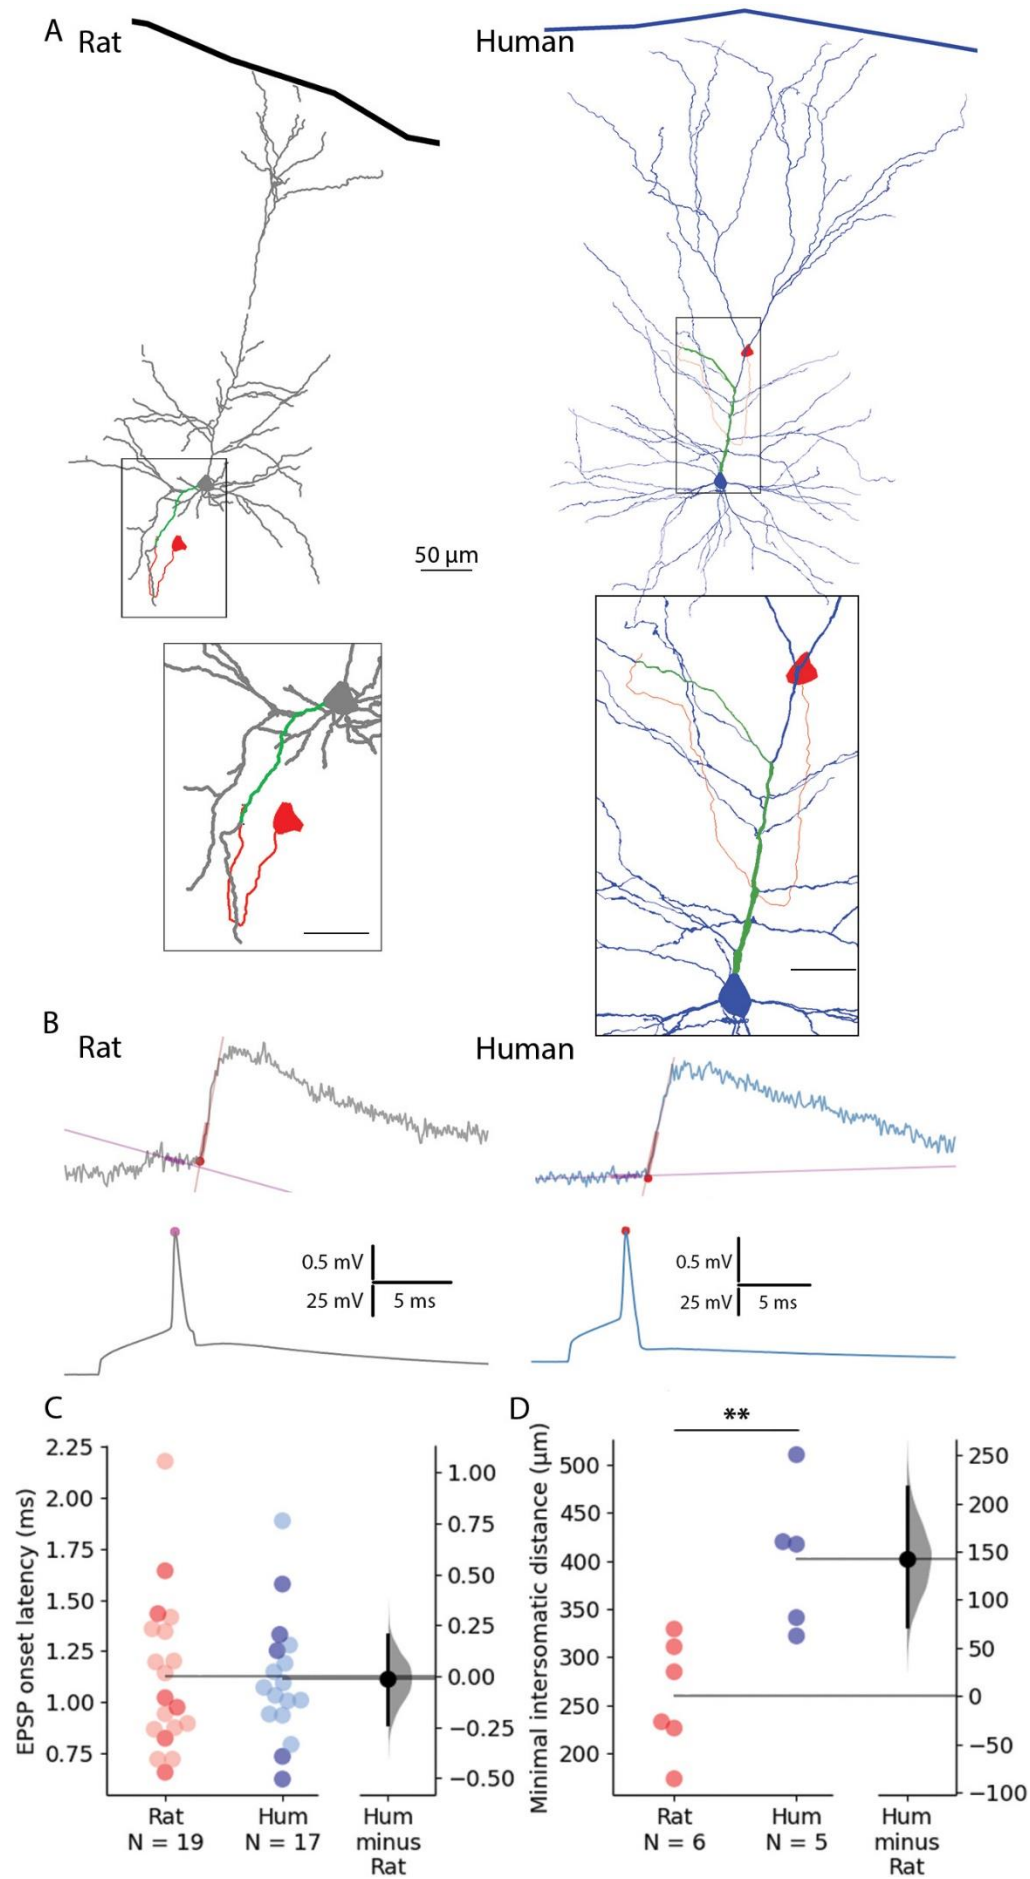

913 **Fig.1. Paired recordings from synaptically connected layer 2/3 rat and human pyramidal cells. A**  
914 Representative reconstructions of electrophysiologically recorded and biocytin filled rat (left, gray soma and  
915 dendrites) and human (right, blue soma and dendrites) synaptically connected pyramidal cell pairs. The presynaptic  
916 soma and the axon are in red; the postsynaptic dendritic path from the synapse to the soma is highlighted in green.  
917 Minimal intersomatic distance was calculated as the sum of the shortest presynaptic axonal (red) and postsynaptic  
918 dendritic (green) paths. Boxed region is magnified on the bottom. Scale bars for insets are 20  $\mu\text{m}$ . **B** Synaptic latency  
919 was determined as the time difference between the peak of the presynaptic AP (pink dot) and the onset of the  
920 postsynaptic excitatory postsynaptic potential (red dot). Straight lines indicate baseline and rise phase fitting. **C**  
921 Summary of synaptic latencies in rat (red) and human (blue) cell pair recordings. Each dot represents the average  
922 latency in a cell measured from the AP peak to EPSP onset as illustrated in panel B. The darker colors represent the  
923 paired recordings with full reconstruction. For these data points there was no significant difference between the two  
924 species (Mann-Whitney test:  $P = 0.931$ ). The extended dataset with cell pairs without reconstruction shows no  
925 significant difference between the two species (Mann-Whitney test:  $P = 0.949$ ). **D** Minimal intersomatic distance of  
926 the recorded cell pairs. Intersomatic distance was calculated through every putative synapse and the shortest was  
927 taken into account. The minimal intersomatic distance was significantly longer in the human dataset compared to rats  
928 (Mann-Whitney test:  $P = 0.009$ ). **\*\*** $P < 0.01$ .

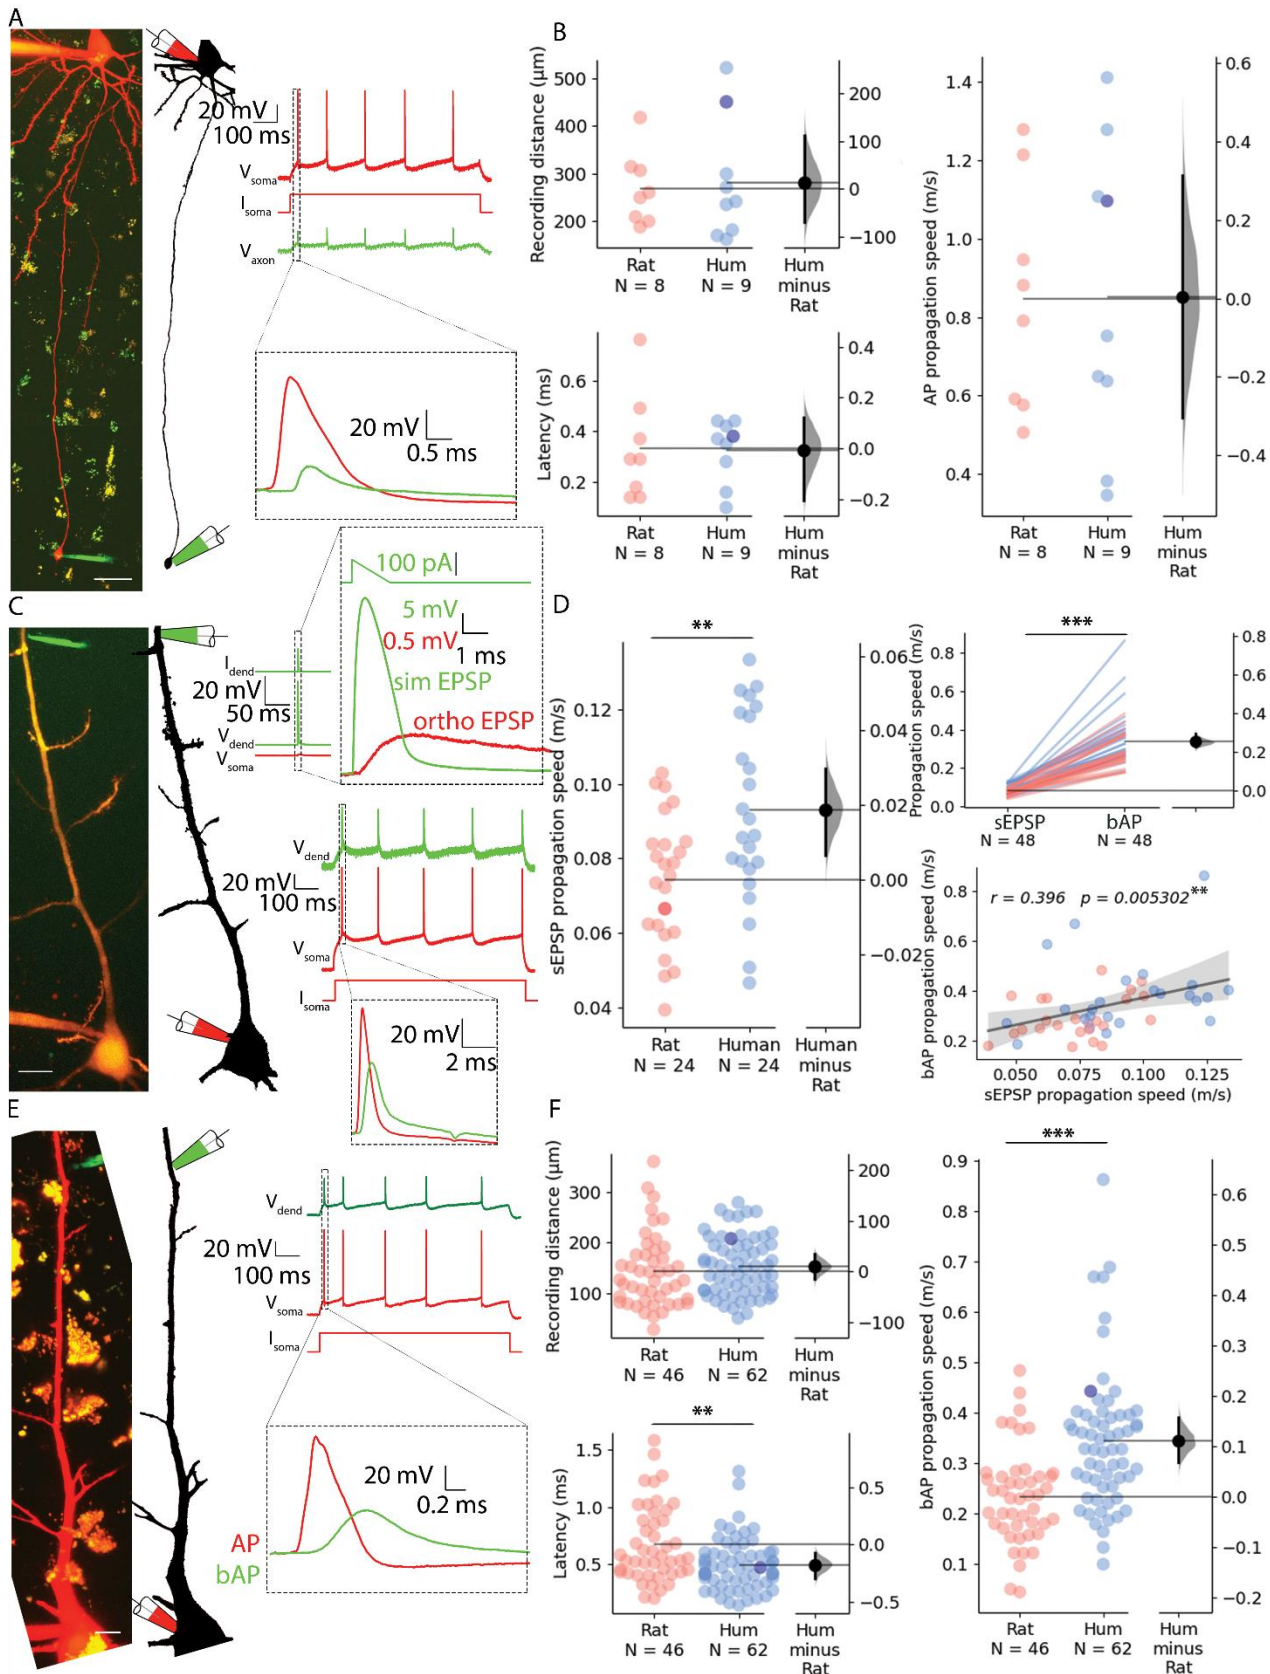

**Fig. 2. Propagation velocity of dendritic and axonal signals in rat and human cortical pyramidal cells.**  
**A** Left, Human pyramidal cell simultaneously recorded with a somatic (red pipette) and axonal (green pipette) electrode. Right, Somatic depolarizing current ( $I_{soma}$ ) evoked action potentials ( $V_{soma}$ ) and their propagation to the axonal recording site ( $V_{axon}$ ). **B** Path distances and AP latencies measured between the soma and axon bleb. AP propagation speed measured along the axon showed no significant difference (two sample  $t$  test:  $P = 0.986$ ). All



recordings were made at resting membrane potential. **C** Left, Two-photon image of a rat pyramidal cell recorded simultaneously with a somatic (red pipette) and dendritic (green pipette) electrode. Top, Dendritic stimulation ( $I_{\text{dend}}$ ) with simulated EPSP waveform ( $V_{\text{dend}}$ ) and somatic response ( $V_{\text{soma}}$ ). Bottom, Somatic stimulation ( $I_{\text{soma}}$ ) triggers an AP ( $V_{\text{soma}}$ ) detected in the dendrite as bAP ( $V_{\text{dend}}$ ). **D** Left, simulated EPSP propagation speed in rat and human cells. Top right, simulated EPSP dendritic propagation speed was lower than bAP propagation speed (sEPSP:  $0.294 \pm 0.085$  m/s vs. bAP:  $0.381 \pm 0.149$  m/s, Wilcoxon signed ranks test:  $P = 1.631 \times 10^{-9}$ ). Bottom right: there was a significant correlation in the forward propagating sEPSP speed and the speed of bAPs. Darker dot is the data for the cell shown on panel C. **E** Left, Two-photon image and reconstruction of a human pyramidal cell recorded simultaneously with a somatic (red pipette) and dendritic (green pipette) electrode. Right, Somatic current ( $I_{\text{soma}}$ ) evoked APs ( $V_{\text{soma}}$ ) and their backpropagation into the dendritic recording site ( $V_{\text{dend}}$ ). **F** Top left, recording distance. Lower left, bAP latency was shorter in human cells (Mann-Whitney test:  $P=0.005$ ). Right, bAP propagation speed was significantly higher in human dendrites (Mann-Whitney test:  $P = 6.369 \times 10^{-6}$ ). Darker dot indicate the data for the cell shown on panel E. Scalebars A and C: 10  $\mu\text{m}$ , E: 20  $\mu\text{m}$ . \* $P < 0.05$ , \*\* $P < 0.01$ , \*\*\* $P < 0.001$

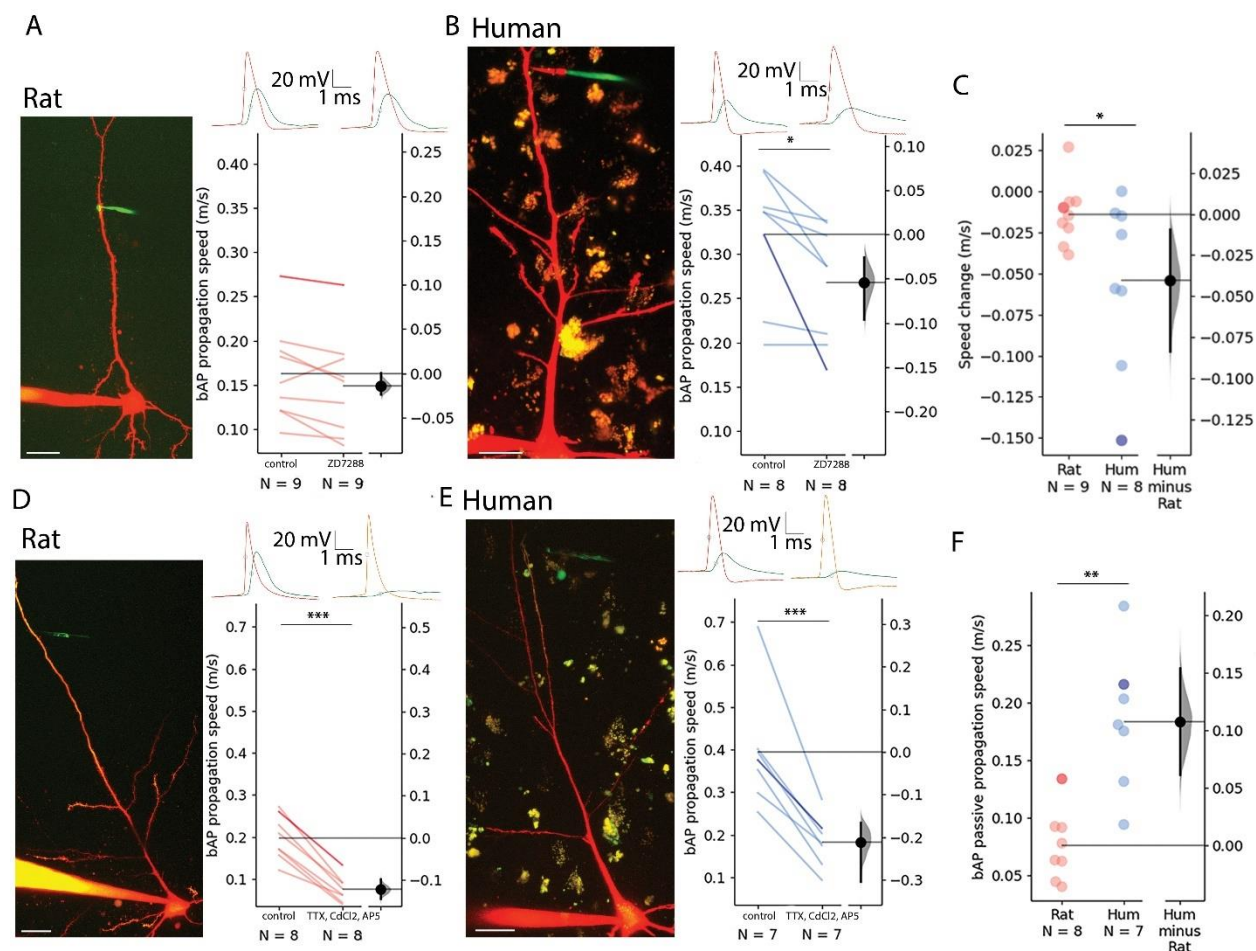

**Fig. 3. Contribution of HCN,  $\text{Ca}^{2+}$ ,  $\text{Na}^{+}$  and NMDA channels to bAP propagation speed in rat and human dendrites.** **A** Representative recording from layer 2/3 pyramidal cell of a rat. Two-photon maximum intensity projection image of Alexa 594 and biocytin filled neuron on the left, representative somatic AP (red) and dendritic bAP (green) on the upper right in the control condition (left) and after 20  $\mu\text{M}$  ZD7288 application (right). Effect of ZD7288 on bAP propagation speed. Darker color represents the example cell. **B** Same as in panel A but for human cells. **C** Changes in bAP propagation speeds from control to drug application. The blockage of HCN channels changed bAP speeds more in human compared to the rat (two-sample  $t$  test:  $P=0.048$ ). The darker colors represent the example cells in panel A and B. **D-E** Same as A and B but the ACSF contained 1  $\mu\text{M}$  TTX, 200  $\mu\text{M}$   $\text{CdCl}_2$ , and 20  $\mu\text{M}$  AP5 in the drug application condition. **F** Comparison of bAP velocities measured in the cocktail of TTX/ $\text{CdCl}_2$ /AP5 blockers reveals higher speed of propagation in human (Mann-Whitney test:  $P=0.001$ ). Scalebars 20  $\mu\text{m}$ . All recordings were done on resting membrane potential. \* $P < 0.05$ , \*\* $P < 0.01$ , \*\*\* $P < 0.001$ .

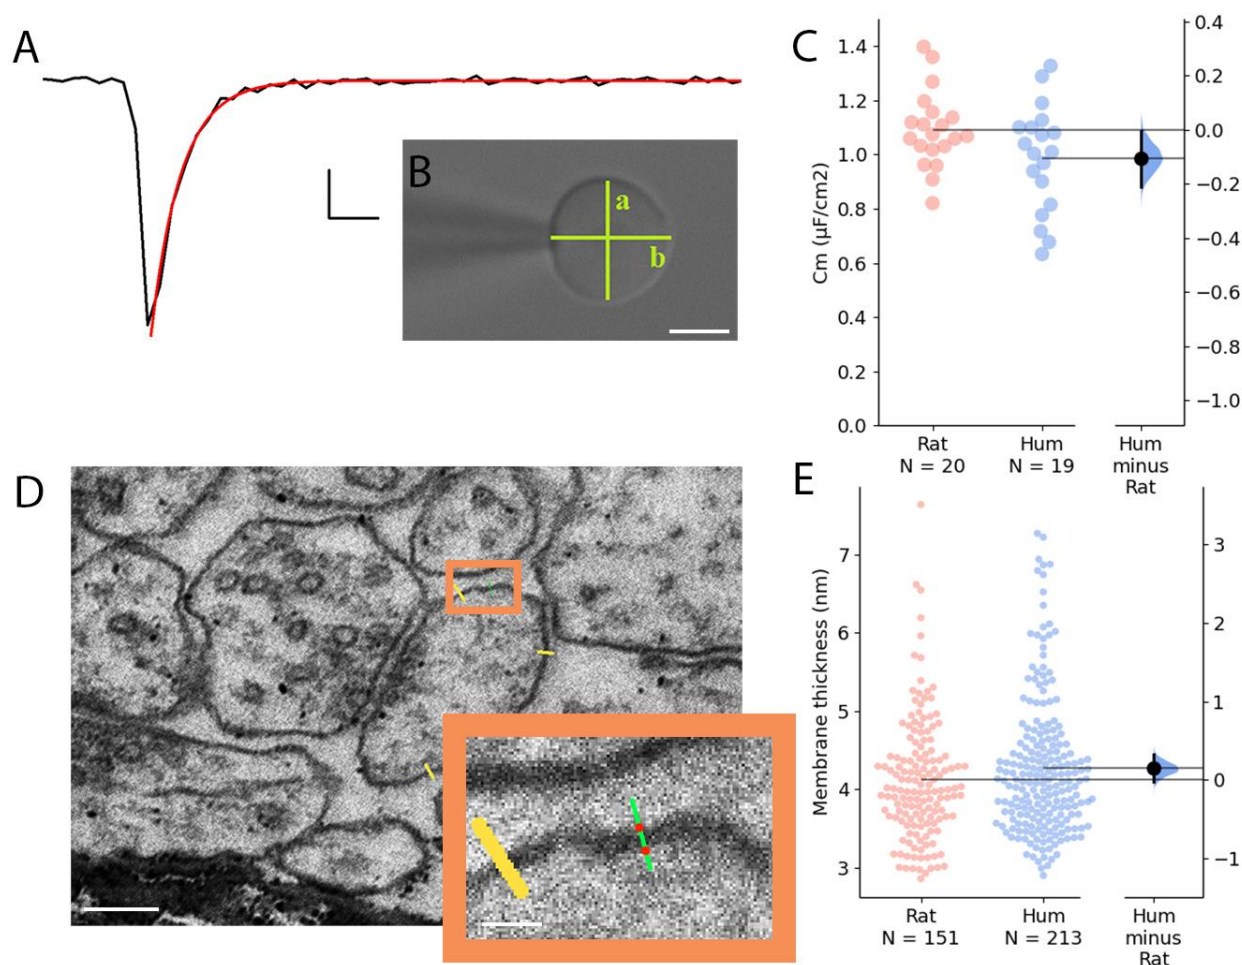

963  
964 **Fig. 4. Comparative analysis of membrane capacitance and thickness in rat and human cortex**

965 **A** Representative capacitive transient of a nucleated patch pulled from layer 2/3 neocortical pyramidal cell (black). A  
966 single exponential function was fitted on the measured signal (red) for the calculation of the time constant of the  
967 membrane. Scale bar: 100 pA, 20  $\mu$ s. **B** Differential interference contrast microscope image of a neuronal nucleus.  
968 The shortest (a) and longest (b) diameter values were used to calculate the membrane surface. Scalebar 5  $\mu$ m. **C**  
969 Specific membrane capacitance of rat (red) and human (blue) neocortical pyramidal cells. **D** Electron micrographs of  
970 dendritic membranes used for membrane thickness measurements. Yellow lines indicate measuring profiles. Scalebar  
971 40 nm. Boxed region magnified on the right. The two red dots on the green line show the edges of the membrane (see  
972 methods). Inset scalebar 10 nm. **E** Membrane thickness of rat (red, n = 151 from n = 3 rat) and human (blue, n = 213  
973 from n = 3 patient) neocortical cell dendrites (Mann-Whitney test: P = 0.212).  
974

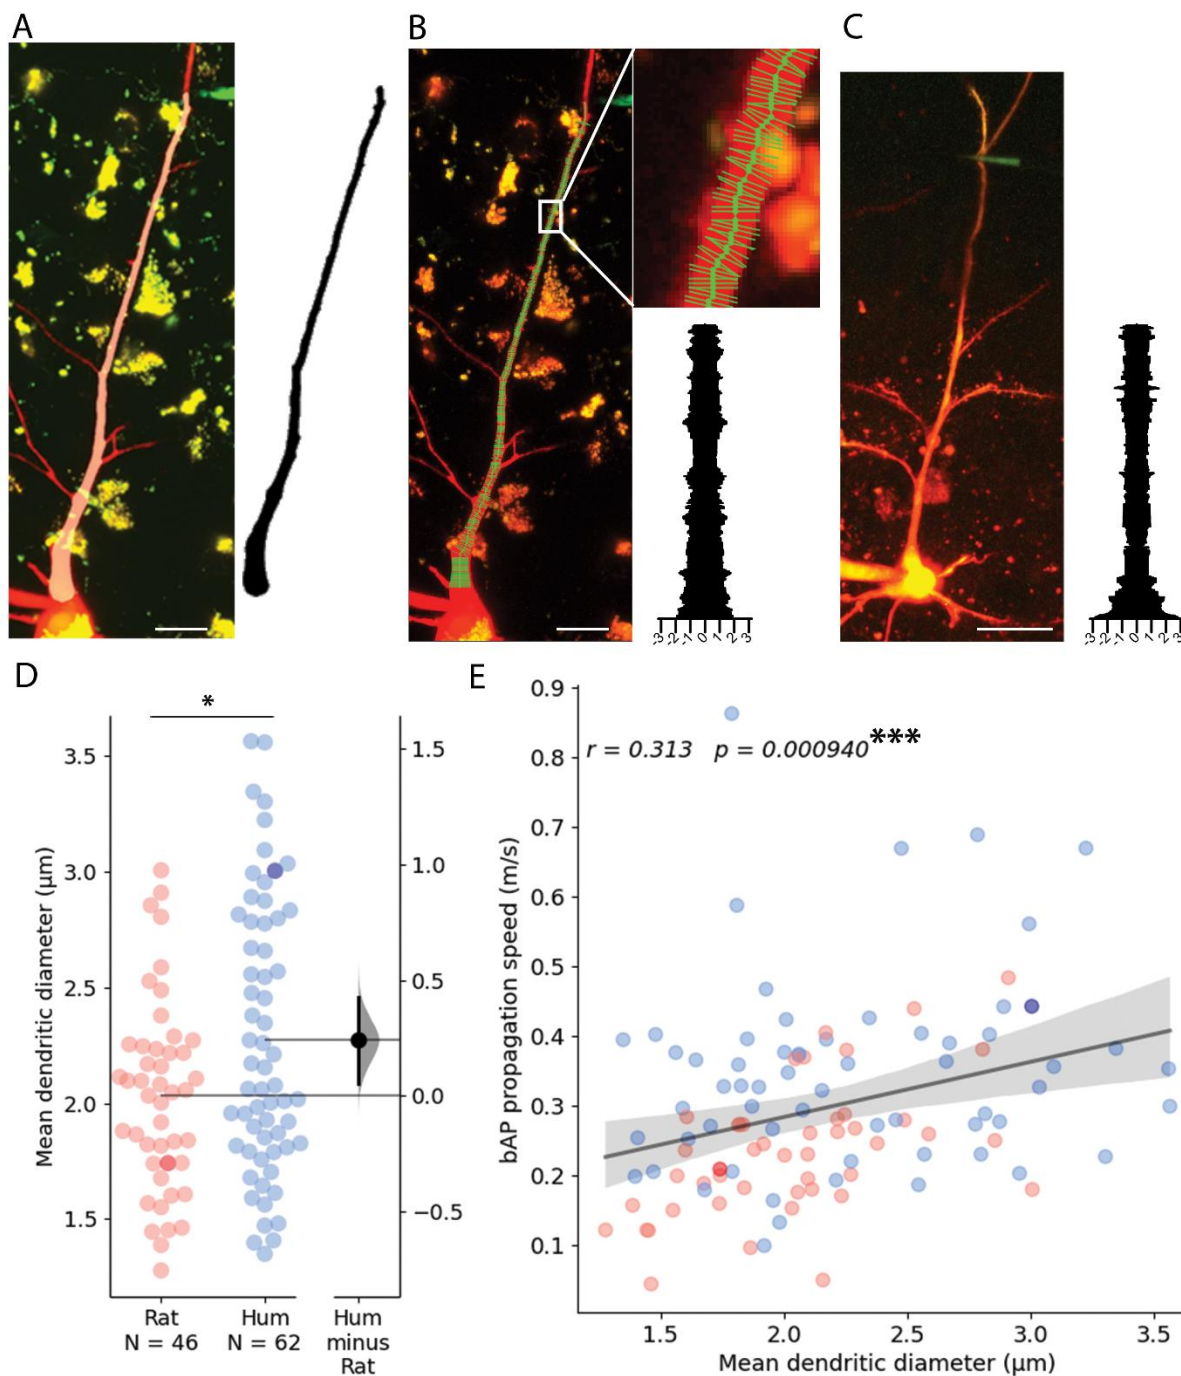

**Fig. 5. Dendritic thickness reconstructions and comparison of layer 2/3 pyramidal cells in the human and rat cortex.** **A** Left, Maximum intensity projection of Alexa594 and biocytin filled human pyramidal cell imaged in two-photon microscope. Right, model of 3D reconstructed apical dendrite. Middle, overlay of the two-photon image and the model. **B** Apical dendrite thickness measurements on the sample shown in A. Left, The center of the dendrite is tracked by a thick green line while the perpendicular thin lines show measured profiles. Right, Stacked thickness measurements with micrometer scale. **C** Same as in B with a rat sample. Scalebars 20 µm. **D** Comparison of rat and human apical dendrite averaged thickness. The mean dendritic diameter of human dendrites was significantly thicker than rat ones (two sample *t* test:  $P = 0.019$ ). Darker dots indicate data measured on image stacks shown in panel B and C. **E** bAP propagation speed correlates significantly with dendrite thickness. Pearson correlation coefficient ( $r$ ) values for fitted lines are shown on the upper left corner of the plot. The shaded area around the regression line shows the 0-100 % confidence interval for the bootstrapped data. \*\*\*  $P < 0.001$ .



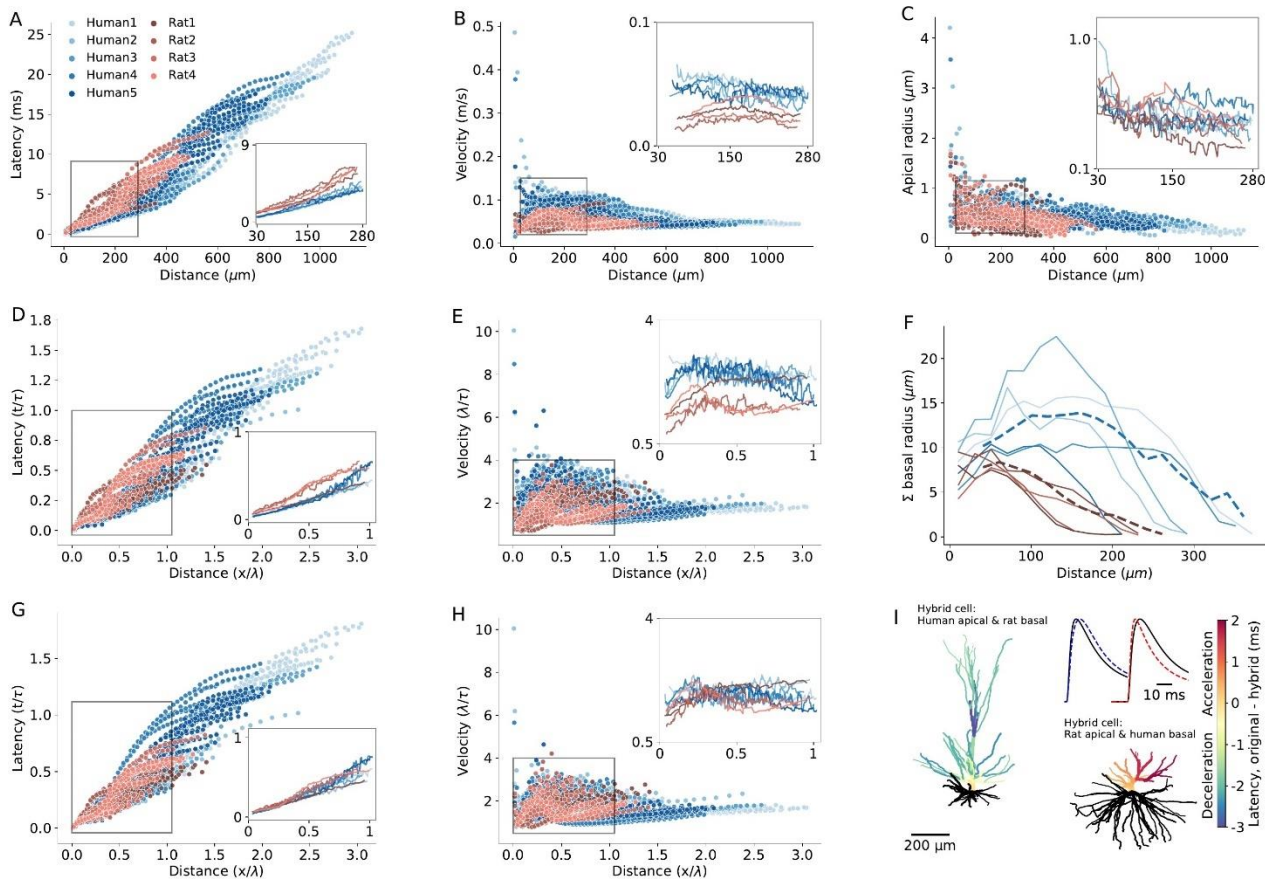

**Fig. 6. Modeling explains the enhanced EPSPs velocity in L2/3 human apical dendrites.** **A** Latency and **B**, velocity of EPSP in models of 5 human (blue) and 4 rat (red) reconstructed L2/3 PCs. Insets show the respective averages for the zoom-in region (box), which brackets the experimental range of dendritic recordings. Note the smaller latency and larger velocity in human PCs. **C**. Dendritic radius as a function of distance from the soma. Note the larger radius of human dendrites in the outlined region. **D,E** As **A** and **B**, but now distance is normalized in cable units (thus incorporating the diameters differences between cells) and time is normalized in units of membrane time constant. **F** Sum of radii of basal dendrites as a function of distance from the soma (blue – human, red – rat), in 20 $\mu$ m bins. Dashed lines are the respective averages. **G-H** As **D** and **E** but for ‘hybrid cells’, computed for the 5 human neurons all having the basal tree of ‘Rat4’ (blue) and for the 4 rat cells, all with the basal tree of ‘Rat4’ (red). Note that the differences in latency and velocity between human and rat were diminished (insets). **I** Example of a color-coded “latency-gram”, visualizing the effect of replacing the basal tree of “Human1” cell with that of “Rat4” (left) and the basal tree of “Rat4” with that of “Human1” (right). The difference in latency was calculated by subtracting the respective values of the original cells from those calculated in the “hybrid cells”. Inset shows examples of somatic EPSP’s in the two respective cases. The original EPSP (black) and the respective hybrid case (in blue – deceleration and in red – acceleration) for synaptic input at 288  $\mu$ m from soma. Specific cable properties in all cells were:  $C_m = 1 \mu\text{F}/\text{cm}^2$ ,  $R_m = 15,000 \Omega\text{cm}^2$ ,  $R_a = 150 \Omega\text{cm}$ .

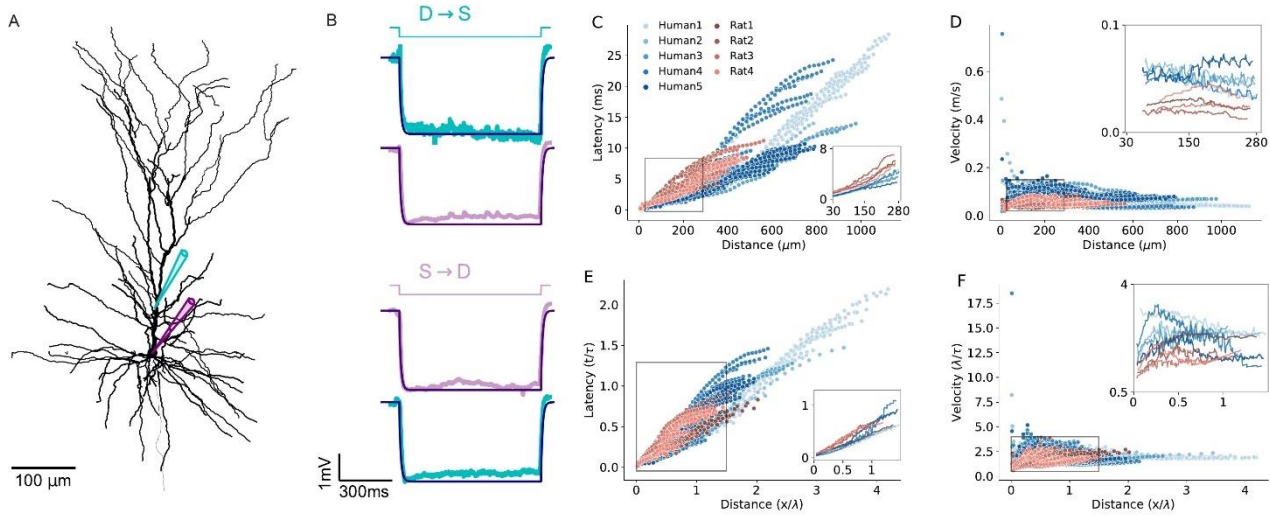

1005

1006

1007

1008

1009

1010

1011

1012

1013

1014

1015

1016

1017

**Fig. 7. Modeling EPSPs latency and velocity in dendrites of human and rat L2/3 pyramidal cells based on experimentally-fitted cable parameters.** **A** Exemplar modeled (“Human5”) L2/3 PC, also showing the locations of the two recording/stimulating electrodes. **B** Top (D→S): step hyperpolarizing current (-100 pA) injected to the dendrite of the modeled cell (cyan). Lower trace: Model fit (dark purple line) to the voltage response at the soma (noisy light purple line). The resultant fit to the local dendritic voltage response is also shown (in cyan). Bottom (S→D): as is the case at top, but with current step injected to the soma (purple step current). This fitting procedure resulted with the following passive parameters:  $C_m = 0.63 \mu F/cm^2$ ,  $R_m = 15,570 \Omega cm^2$ ,  $R_a = 109 \Omega cm$ . **C** Latency and **D** Velocity of EPSPs for the 9 model cells as in Figure 6A,B, but now with specific cable parameters fitted to the individual modeled neurons (see Table 1). **E-F** As in C and D, with distance normalized in cable units and time normalized by the membrane time constant (see Table 2). Note the smaller latency and larger velocity for the human PCs, which is now more significant as compared to the case where the cable parameters were uniform for all modeled cells (compare to Figure 6D and E).

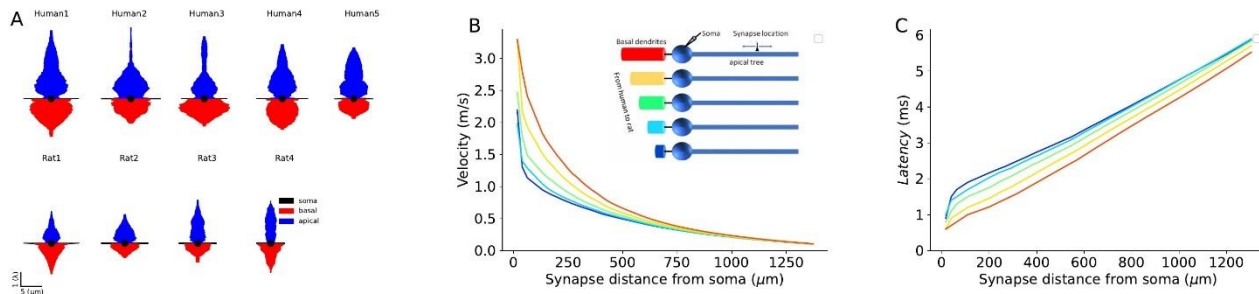

1018

1019

1020

1021

1022

1023

1024

1025

1026

1027

1028

**Fig. 8. Impact of conductance load of the basal tree on EPSPs velocity and latency.** **A** Equivalent cable for the apical tree (in blue) and the basal tree (in red) for the 9 modeled L2.3 cells in this study. Note the relatively large conductance load (sink) imposed by the large basal tree in human cells. **B** EPSP velocity and **C** latency as a function of the distance of the (apical) synapse from the soma. The synapse was located along the “apical” cable (blue cylinder, inset). The respective 5 cases are shown in the inset. Velocity and latency were computed as in Figs. 6 and 7. Note the enhanced velocity and reduced latency for larger basal dendrites. Cable parameters were:  $C_m = 1 \mu F/cm^2$ ,  $R_m = 15,000 \Omega cm^2$ ,  $R_a = 150 \Omega cm$ . The apical cylinder is of infinite length with diameter of  $3 \mu m$ ; the basal tree (color cables) have linearly increasing diameter ( $d$ ) and length ( $L$ ), approximating the increment from rat to human basal trees (Fig 6F): red ( $l = 800 \mu m$ ,  $d = 20 \mu m$ ), yellow ( $l = 700 \mu m$ ,  $d = 18 \mu m$ ); green ( $l = 600 \mu m$ ,  $d = 16 \mu m$ ); light blue ( $l = 500 \mu m$ ,  $d = 14 \mu m$ ); dark blue ( $l = 400 \mu m$ ,  $d = 12 \mu m$ ). Soma diameter was set to  $20 \mu m$ .



1029

| Cell name         | $C_m$ ( $\mu F/cm^2$ ) | $R_m$ ( $\Omega cm^2$ ) | $R_a$ ( $\Omega cm$ ) |
|-------------------|------------------------|-------------------------|-----------------------|
| Human1            | 0.65                   | 19,875                  | 298                   |
| Human2            | 0.54                   | 16,492                  | 298                   |
| Human3            | 0.85                   | 12,872                  | 103                   |
| Human4            | 0.77                   | 21,522                  | 209                   |
| Human5            | 0.63                   | 15,570                  | 109                   |
| Rat1              | 0.84                   | 13,110                  | 267                   |
| Rat2              | 1.16                   | 9,084                   | 249                   |
| <b>Mean human</b> | <b>0.69</b>            | <b>17,266</b>           | <b>203</b>            |
| <b>Mean rat</b>   | <b>1.00</b>            | <b>11,097</b>           | <b>258</b>            |

1030

1031

1032

**Table 1. Passive cable parameters fitted to experimental data.**  $C_m$  and  $R_m$  are the specific membrane capacitance and resistivity, respectively;  $R_a$  is the specific axial resistance.

| Cell name         | $d_{max}$ ( $\mu m$ ) | $l_{max}$ ( $\mu m$ ) | $L_{max}$   | $\tau$ (ms) | Latency (ms) |
|-------------------|-----------------------|-----------------------|-------------|-------------|--------------|
| Human1            | 0.91                  | 283.5                 | 0.9         | 12.92       | 4.65         |
| Human2            | 0.84                  | 281.5                 | 0.87        | 9.46        | 3.5          |
| Human3            | 0.64                  | 284.7                 | 0.74        | 10.90       | 3.56         |
| Human4            | 1.19                  | 283.0                 | 0.67        | 16.60       | 4.28         |
| Human5            | 0.92                  | 282.9                 | 0.59        | 9.80        | 2.82         |
| Rat1              | 0.35                  | 281.7                 | 1.29        | 11.00       | 6.25         |
| Rat2              | 0.5                   | 282.7                 | 1.08        | 10.50       | 7.03         |
| Rat3              | 0.85                  | 283.2                 | 0.57        | 14.5        | 5.76         |
| Rat4              | 0.86                  | 279.5                 | 0.61        | 11.9        | 5.51         |
| <b>Mean human</b> | <b>0.9</b>            | <b>283</b>            | <b>0.75</b> | <b>11.9</b> | <b>3.76</b>  |
| <b>Mean rat</b>   | <b>0.64</b>           | <b>281.8</b>          | <b>0.89</b> | <b>12</b>   | <b>6.14</b>  |

1033

1034

1035

1036

1037

1038

1039

1040

**Table 2. Model prediction of the maximal EPSPs latency within experimental recording distance range per modeled cell.** Cable parameters were fitted per cell as in Table 1.  $l_{max}$  is the maximal physical distance from which the respective experiments (per cell) were performed (zoom-in region in Fig. 8C,D).  $d_{max}$  is the (average) diameter at  $l_{max}$ .  $L_{max}$  is the respective distances in cable units ( $L = \frac{l}{\lambda}$ );  $\tau$  is the membrane time constant ( $C_m * R_m$ ). Latency is the maximal latency measured at the maximal distance. All maximal values are averaged across branches at  $l_{max}$ , within  $10\mu m$  window bin.

1041  
1042

## Supplementary Materials

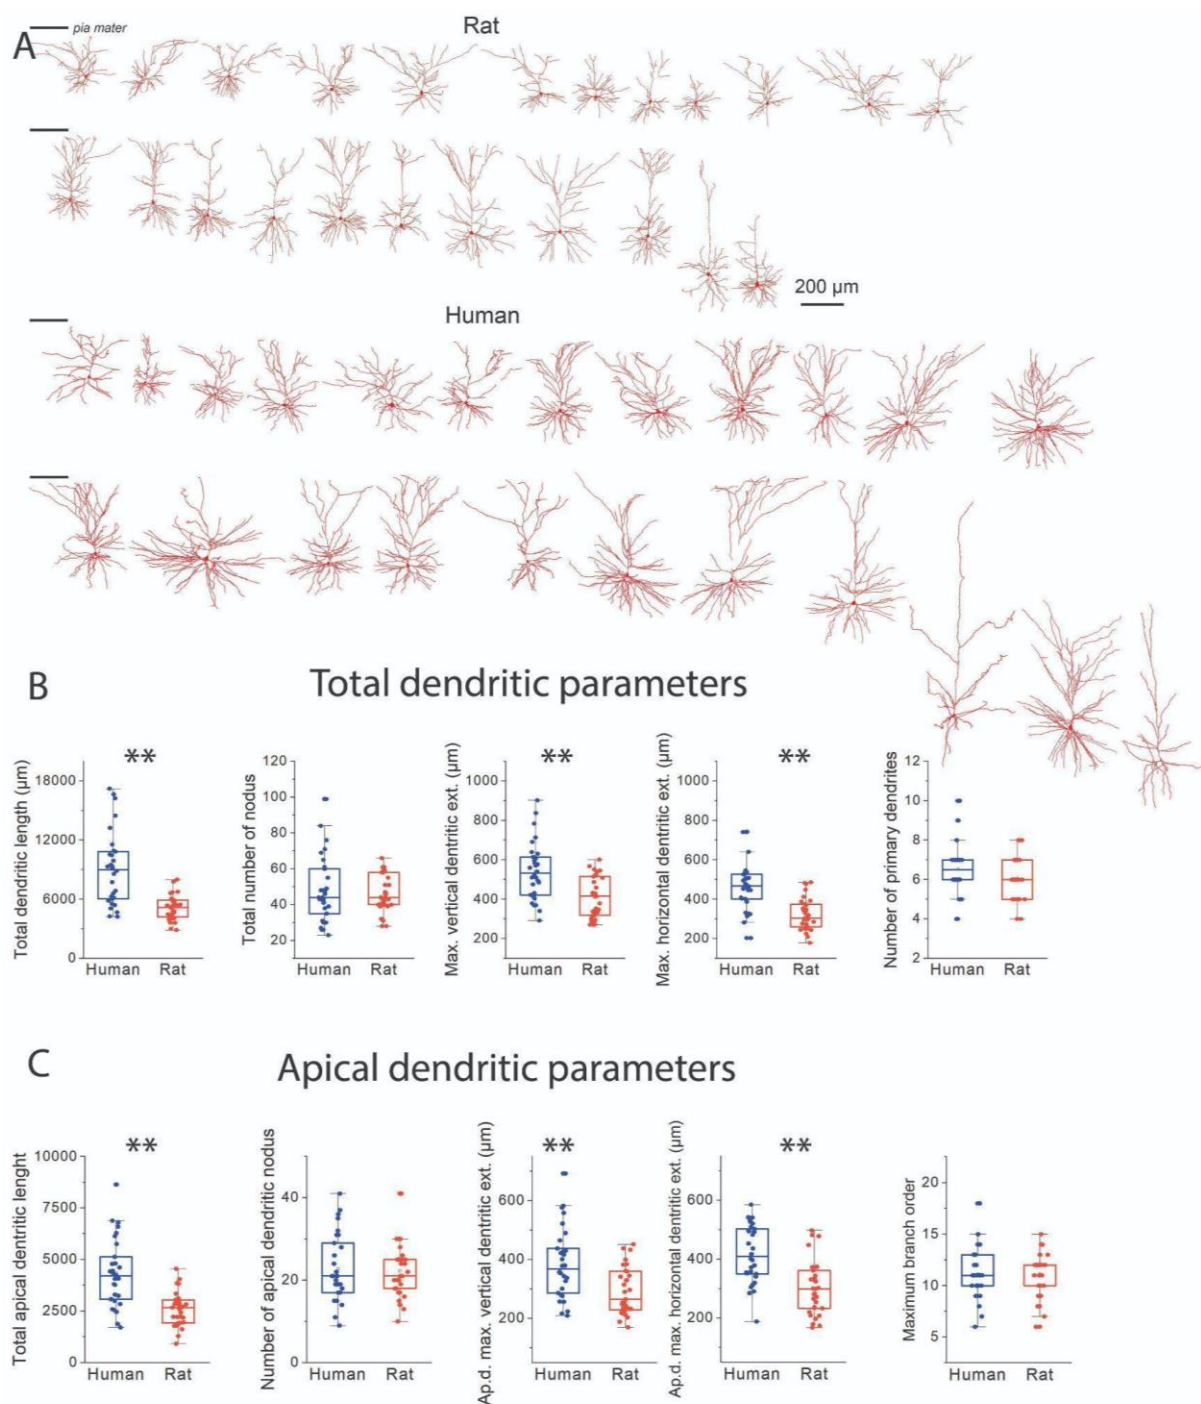

1043

1044 **Suppl.Fig. 1. Size comparison of layer 2/3 pyramidal cells in the human and rat cortex.** **A** Sample  
1045 reconstructions of fully recovered rat and human cortical pyramidal cells. Left horizontal line indicates the location of  
1046 pia mater. **B** Comparison of dendritic length, number of nodes, maximum vertical and horizontal extension, and the  
1047 number of primary dendrites respectively of all reconstructed dendritic arborization. **C** Comparison of length, number  
1048 of nodes, maximum vertical and horizontal extension and the number of maximum branch order respectively of the  
1049 apical dendrites. Boxes represent median and IQR, whiskers represent outlier range ( $\pm 1.5$  IQR); mean is indicated by  
1050 open square, crosses denote minimum and maximum values. \*\* denotes significant difference  $P < 0.01$ .

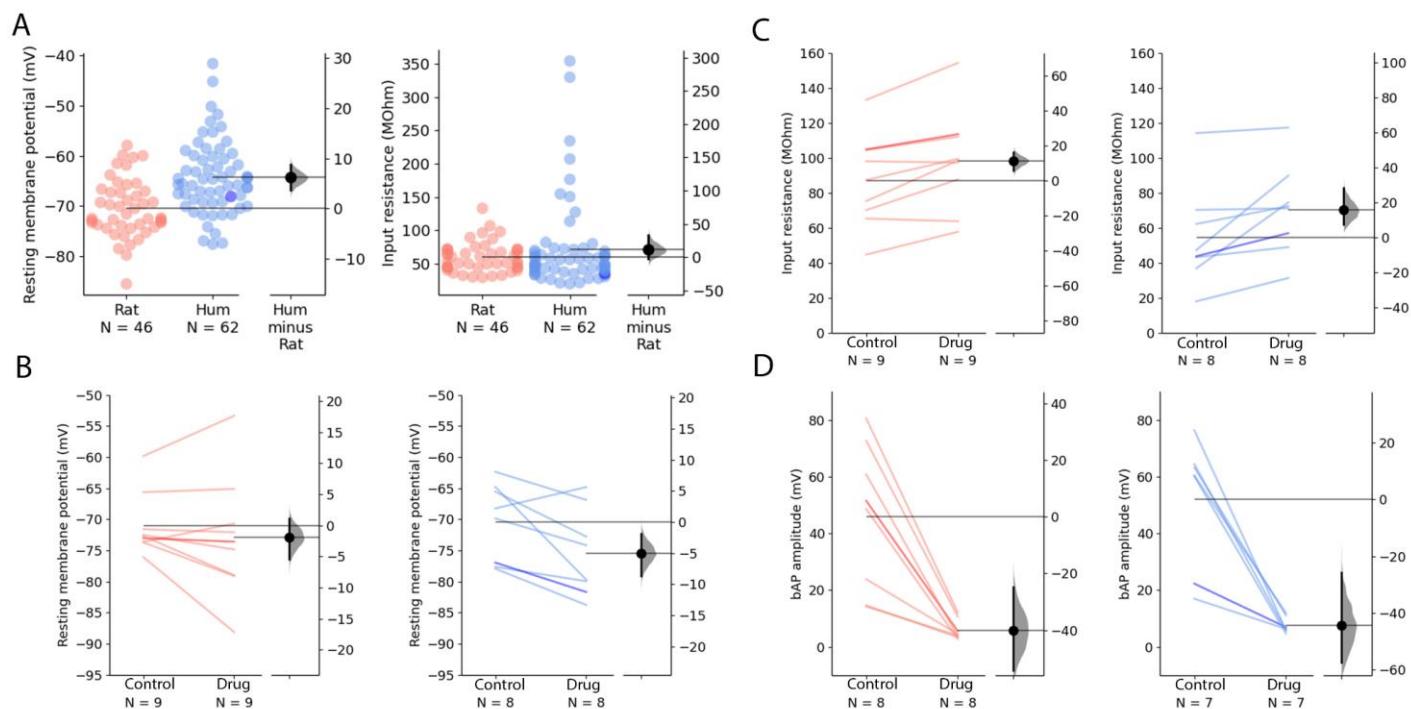

1051

1052

1053

1054

1055

1056

1057

1058

1059

1060

1061

1062

1063

1064

1065

**Suppl. Fig. 2. Properties of dendro-somatic recording and measured membrane parameters.**

**A** Resting membrane potential of the recorded cells (rat:  $-70.49 \pm 5.78$  mV, human:  $-64.30 \pm 7.28$  mV, Mann-Whitney U test:  $P = 7.37 \times 10^{-6}$ ) were different in human and in rat pyramidal cells. Input resistance of recorded cells (rat:  $59.56 \pm 21.86$  MΩ, human:  $71.37 \pm 65.48$  MΩ, Mann-Whitney U test:  $P = 0.3466$ ). **B** Resting membrane potential of recorded cells after ZD7288 application (red, rat control:  $-70.98 \pm 5.04$  mV vs rat ZD7288:  $-72.88 \pm 9.75$  mV, Wilcoxon signed ranks test:  $P = 0.40694$ ; blue, human control:  $-70.43 \pm 6.28$  mV vs human ZD7288:  $-75.47 \pm 6.991$  mV, paired sample t test:  $P = 0.02682$ ). **C** The input resistance changed significantly in rat (red, rat control:  $86.95 \pm 26.34$  MΩ vs rat ZD7288:  $98.18 \pm 28.53$  MΩ, paired sample t test:  $P = 0.00488$ ) and human (blue, human control:  $54.38 \pm 28.8$  MΩ vs human ZD7288:  $70.21 \pm 26.09$  MΩ, paired sample t test:  $P = 0.02434$ ) after the application of 20 μM ZD7288. **D** Effect of voltage gated ion channel blockage on bAP amplitude. The amplitudes of the bAPs were significantly decreased upon the application of voltage gated ion channel blockers (rat control:  $46.32 \pm 25.78$  mV vs rat TTX, CdCl<sub>2</sub>, AP5:  $6.26 \pm 3.47$  mV, paired sample t test:  $P = 0.00188$ , human control:  $51.95 \pm 22.81$  mV vs. human TTX, CdCl<sub>2</sub>, AP5:  $7.52 \pm 2.84$  mV, Wilcoxon signed ranks test:  $P = 0.0156$ ).

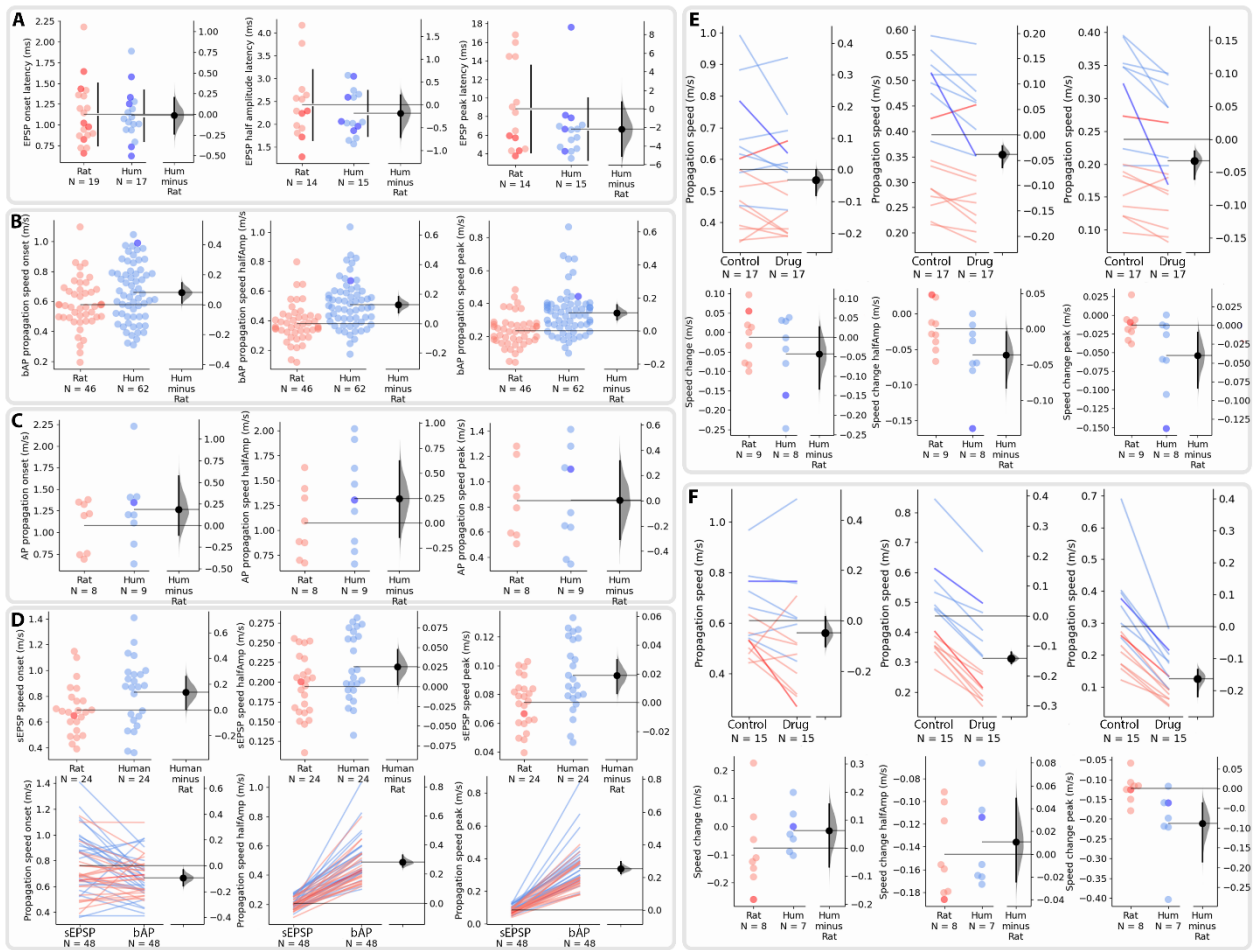

1066

1067

1068

1069

1070

1071

1072

**Suppl. Fig. 3 Latencies and propagation speed measured at different points of the propagating waveforms. A**

The presynaptic AP peak and EPSP latency were measured at different points. Left: latency at onset, middle: latency at half amplitude, right: latency at EPSP peak. B: Same as A but for bAP speed values. C Same as A but for AP axonal speed values. D Upper: Same as A but for sEPSP speed values. Lower: comparison of sEPSP and bAP speed. E: Pharmacological experiments with ZD7288. F: Same as E but for a cocktail of TTX, CdCl<sub>2</sub>, and AP5.

1073  
1074

| Cell name | Length factor | Diameter factor |
|-----------|---------------|-----------------|
| Human1    | 1.26          | 0.84            |
| Human2    | 1.03          | 1.00            |
| Human3    | 1.24          | 0.95            |
| Human4    | 1.25          | 1.23            |
| Human5    | 1.26          | 0.99            |
| Rat1      | 1.05          | 1.12            |
| Rat2      | 1.45          | 1.11            |
| Rat3      | 1.67          | 1.33            |
| Rat4      | 1.08          | 1.37            |

1075  
1076

**Suppl. Table 1. Morphological scaling factors due to fixation.**



1077

| Cell name         | $l_{max}$ ( $\mu\text{m}$ ) | $L_{max}$   | Latency (ms) |
|-------------------|-----------------------------|-------------|--------------|
| Human1            | 288.8                       | 0.68        | 3.66         |
| Human2            | 288.5                       | 0.67        | 3.56         |
| Human3            | 288.995                     | 0.74        | 4.93         |
| Human4            | 288.7                       | 0.67        | 4.22         |
| Human5            | 287.4                       | 0.87        | 5.64         |
| Rat1              | 287.45                      | 0.96        | 5.48         |
| Rat2              | 287.186                     | 0.68        | 6.3          |
| <b>Mean human</b> | <b>288.48</b>               | <b>0.73</b> | <b>4.4</b>   |
| <b>Mean rat</b>   | <b>287.32</b>               | <b>0.82</b> | <b>5.89</b>  |

1078

1079

1080

1081

1082

1083

1084

1085

**Suppl. Table 2. Model prediction of the maximal EPSPs latency within experimental recording distance range per modeled cell for the case of identical cable parameters for all cells.**  $l_{max}$  is the maximal physical distance from which the respective experiments (per cell) were performed (zoom-in region in Fig. 6A,B).  $d_{max}$  is the (average) diameter at  $l_{max}$ .  $L_{max}$  is the respective distances in cable units ( $L = \frac{l}{\lambda}$ );  $\tau$  is the membrane time constant ( $C_m * R_m$ ). Latency is the maximal latency measured at the maximal distance. All maximal values are averaged across branches at  $l_{max}$ , within  $10\mu\text{m}$  window bin. Uniform cable parameters were used for all cells as in Figure 6.

1086  
1087

| Cell name         | $d_{max}$ ( $\mu\text{m}$ ) | $l_{max}$ ( $\mu\text{m}$ ) | $L_{max}$   | Latency (ms) |
|-------------------|-----------------------------|-----------------------------|-------------|--------------|
| Human1            | 0.91                        | 283.5                       | 0.66        | 6.17         |
| Human2            | 0.84                        | 281.5                       | 0.60        | 4.46         |
| Human3            | 0.64                        | 284.7                       | 0.74        | 6.37         |
| Human4            | 1.19                        | 283.0                       | 0.61        | 5.35         |
| Human5            | 0.92                        | 282.9                       | 0.63        | 5.17         |
| Rat1              | 0.35                        | 281.7                       | 0.9         | 6.16         |
| Rat2              | 0.5                         | 282.7                       | 0.65        | 5.97         |
| Rat3              | 0.85                        | 283.2                       | 0.64        | 5.95         |
| Rat4              | 0.86                        | 279.5                       | 0.54        | 6.43         |
| <b>Mean human</b> | <b>0.9</b>                  | <b>283</b>                  | <b>0.65</b> | <b>5.6</b>   |
| <b>Mean rat</b>   | <b>0.64</b>                 | <b>281.8</b>                | <b>0.68</b> | <b>6.1</b>   |

1088  
1089  
1090  
1091  
1092  
1093  
1094  
1095  
1096

**Suppl. Table 3. Model prediction of the maximal EPSPs latency within experimental recording distance range per modeled cell for the case of identical cable parameters and “hybrid cell” with “Rat4” basal tree.**  $l_{max}$  is the maximal physical distance from which the respective experiments (per cell) were performed (zoom-in region in Fig. 6E,F).  $d_{max}$  is the (average) diameter at  $l_{max}$ .  $L_{max}$  is the respective distances in cable units ( $L = \frac{l}{\lambda}$ );  $\tau$  is the membrane time constant ( $C_m * R_m$ ). Latency is the maximal latency measured at the maximal distance. All maximal values are averaged across branches at  $l_{max}$ , within  $10\mu\text{m}$  window bin. Uniform cable parameters were used for all cells as in Figure 6.

1097  
1098

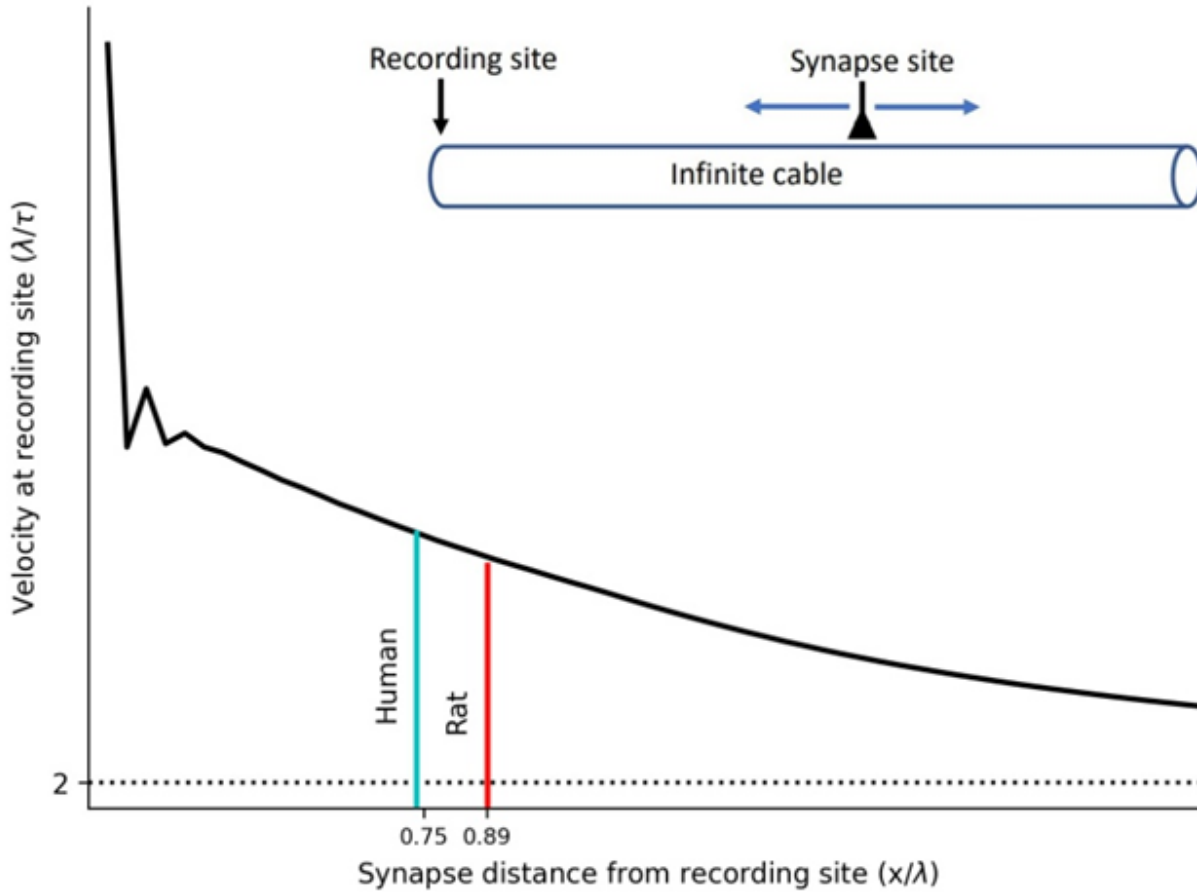

1099  
1100  
1101  
1102  
1103  
1104  
1105  
1106  
1107

**Suppl. Fig.4. Velocity of EPSP peak as a function of distance from the synapse input site for the case of an infinite passive cylindrical cable with sealed end at the recording site ( $X = 0$ ).** Note the high velocity of the EPSP peak when the synapse is near the recording site; the velocity converges to  $2\lambda/\tau$  for electrotonically distant synapses (horizontal dotted line). Cyan and red vertical lines show the maximal mean cable distance  $L_{\max}$  (Table 2) measured experimentally in human and in rat neurons. Cable parameters and diameter are as in Table 1 and Table 2 respectively. Note that because, on average, the location of the experimentally-recorded human synapses is closer (in cable units) to the recording site (“soma”), the EPSP velocity in human falls at a higher velocity compared to that of the rat.

1108  
1109

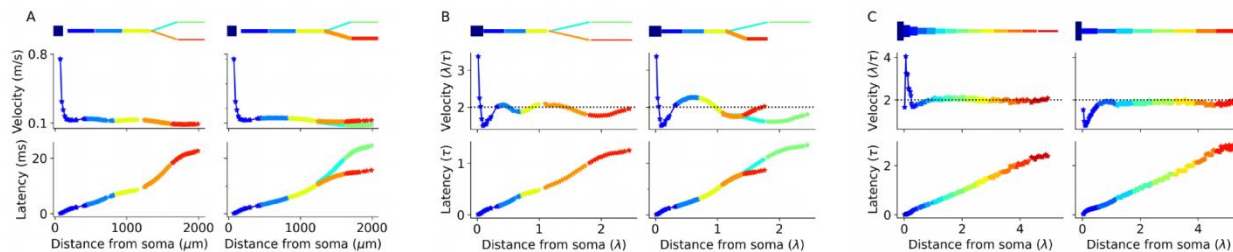

1110  
1111  
1112  
1113  
1114  
1115  
1116  
1117  
1118  
1119  
1120  
1121  
1122  
1123  
1124  
1125

**Suppl.Fig.5. Morphological irregularities affect EPSP latency and velocity.** **A** Cable with a single branch, with symmetrical (top left) or asymmetrical (top right) branches. Thick branches diameter is  $4\mu\text{m}$ , while thin branches' diameter is  $1\mu\text{m}$ . Latency and velocity were calculated as explained in the text and in Figs. 7 and 8; synaptic inputs were activated at different sites along the structure. The recording site ("soma") is at left (dark blue rectangle), with diameter of  $13\mu\text{m}$ . **B** As in A, with normalized space and time constants. For symmetrical branches, both latency and velocity overlap for the two branches (left column in both **A** and **B**), while in asymmetrical case, the latency from the thick branch is smaller as it is electrotonically closer to the soma and, therefore, for the same physical distance the initial velocity of the EPSP at its site of origin is larger (right column in **B**, red branch compared with green). However, there is a small increase in latency (decrease in velocity at these daughter branches) due to local impedance mismatch. **C**. Cable with diameters replicating the apical main-branch of 'Human2' (left column) and 'Rat1' (right column) PCs. Note the local irregularities shifts the velocity above (left column) or below (right column)  $2\lambda/\tau$  despite having identical lengths across all sections. Moreover, velocity pattern changes due to the proximity of the synapse to the soma, as a function of the cable diameters. Cable parameters are identical for all morphologies ( $C_m = 1.5 \mu\text{F}/\text{cm}^2$ ,  $R_m = 10,000 \Omega\text{cm}^2$ ,  $R_a = 150 \Omega\text{cm}$ ).

1126  
1127

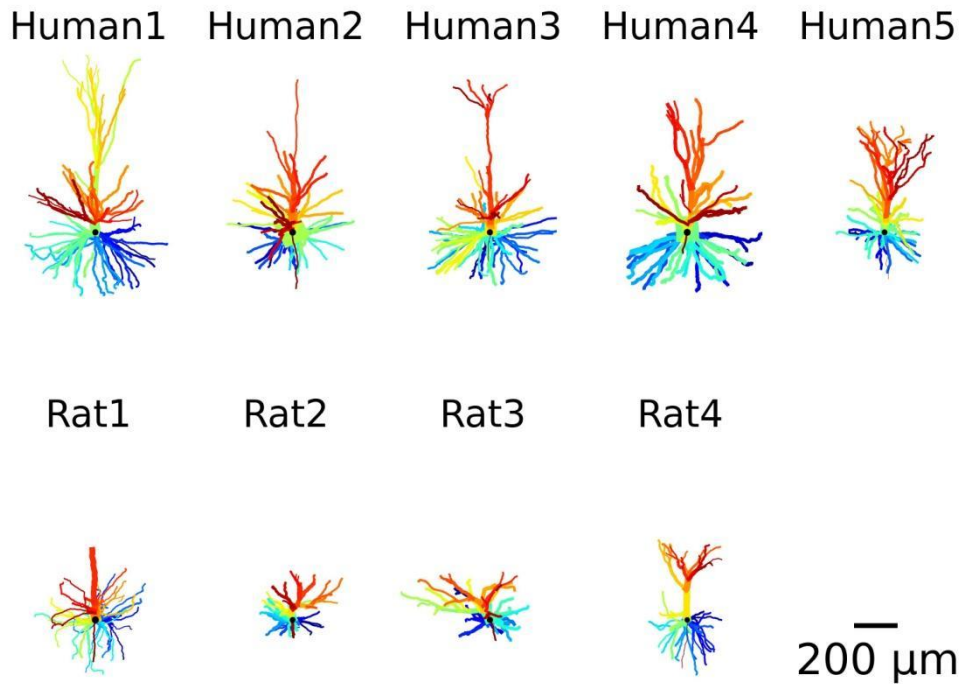

1128  
1129  
1130

**Suppl.Fig.6. Morphology of the nine modeled cells.** Each dendritic branch is marked by a different color.



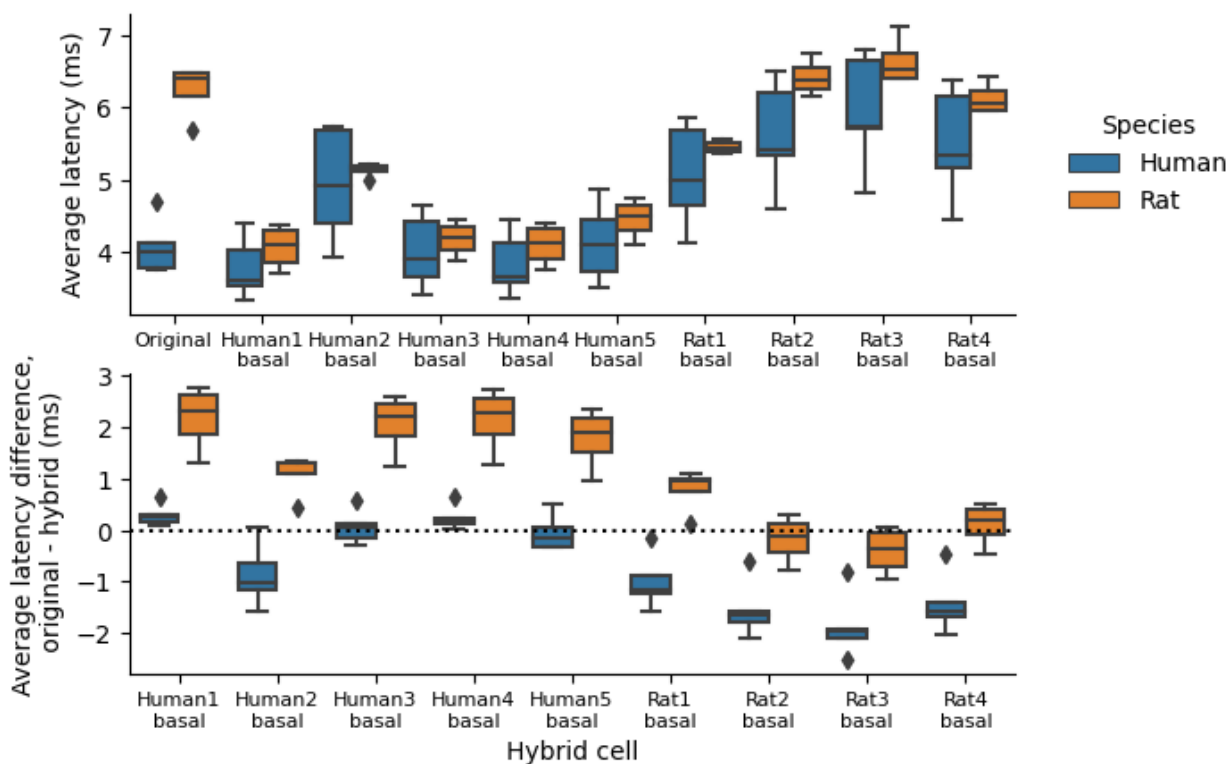

1131  
1132  
1133  
1134  
1135  
1136  
1137  
1138

**Suppl.Fig.7. Quantifying the effect of switching the basal tree between rat and human (and vice versa- the ‘hybrid cells’ on mean latency. Top:** Average latency as a result of using each of the nine modeled cells basal trees as the basal tree of all other cells (e.g. a “hybrid cell”), compared with original models latencies. Average latency was calculated similar to Suppl. Table 2 (shown in “Original” column) and Suppl. Table 3 (shown in “Rat 4 basal” column). **Bottom:** Difference in latency calculated by subtracting the original values from the respective hybrid case (e.g. top panel). Note the acceleration due to the human basal trees versus the deceleration due to rat basal trees.

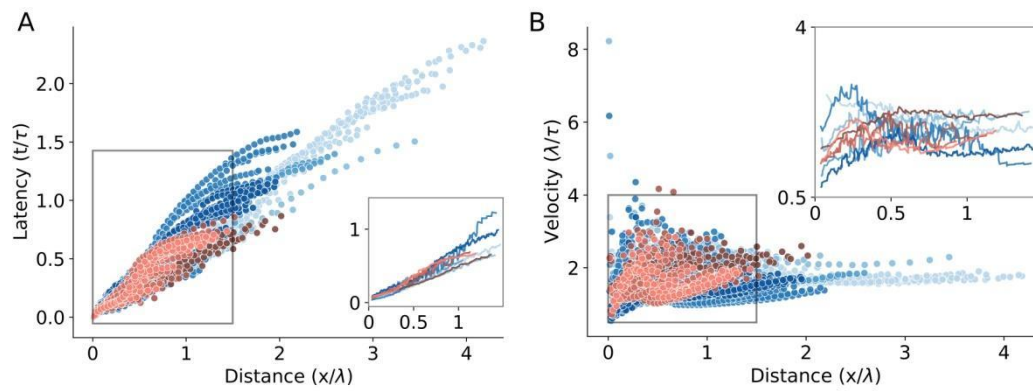

1139  
1140  
1141  
1142  
1143  
1144  
1145  
1146  
1147

**Suppl.Fig.8. ‘hybrid cells’ effect on latency and velocity for the experimentally-fitted cable parameters. A,B** Same as Fig 7E,F but for ‘hybrid cells’, computed for the 5 human neurons, all having the basal tree of ‘Rat4’ (in blue) and for the 4 rat cells, all with the basal tree of ‘Rat1’ (in red). Note that the differences in latency and velocity between human and rat were diminished (insets).

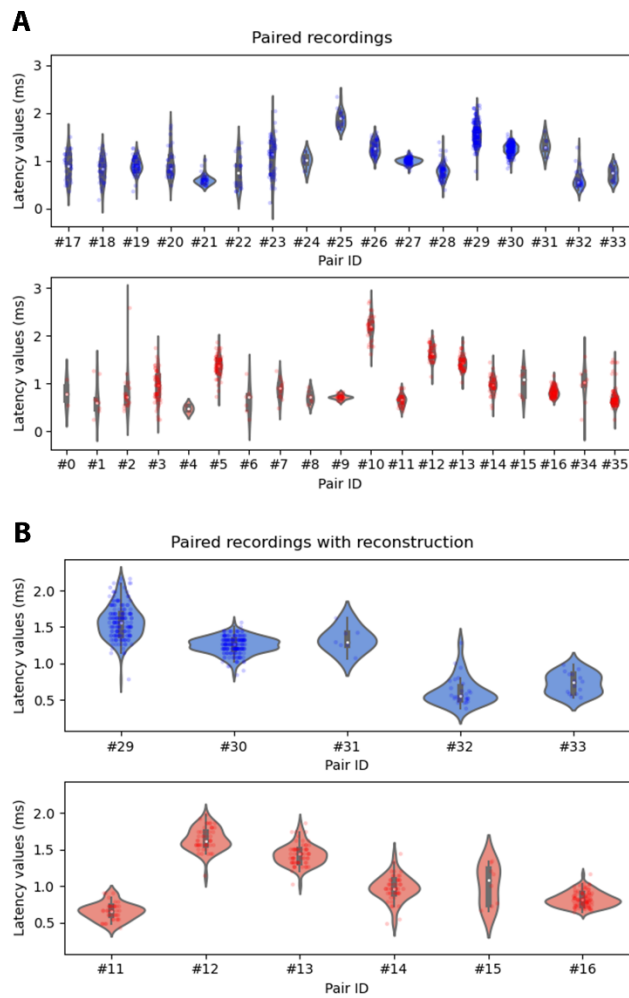

1148

1149

1150

1151

**Suppl.Fig.9. Paired recordings EPSP latency distributions.** **A** EPSP latency distributions from all the cell pairs shown in Fig. 1. **B** EPSP latency distributions for the fully reconstructed cell pairs. Blue: human cell pairs, red: rat cell pairs. Each dot represent a latency value measured on a single sweep.

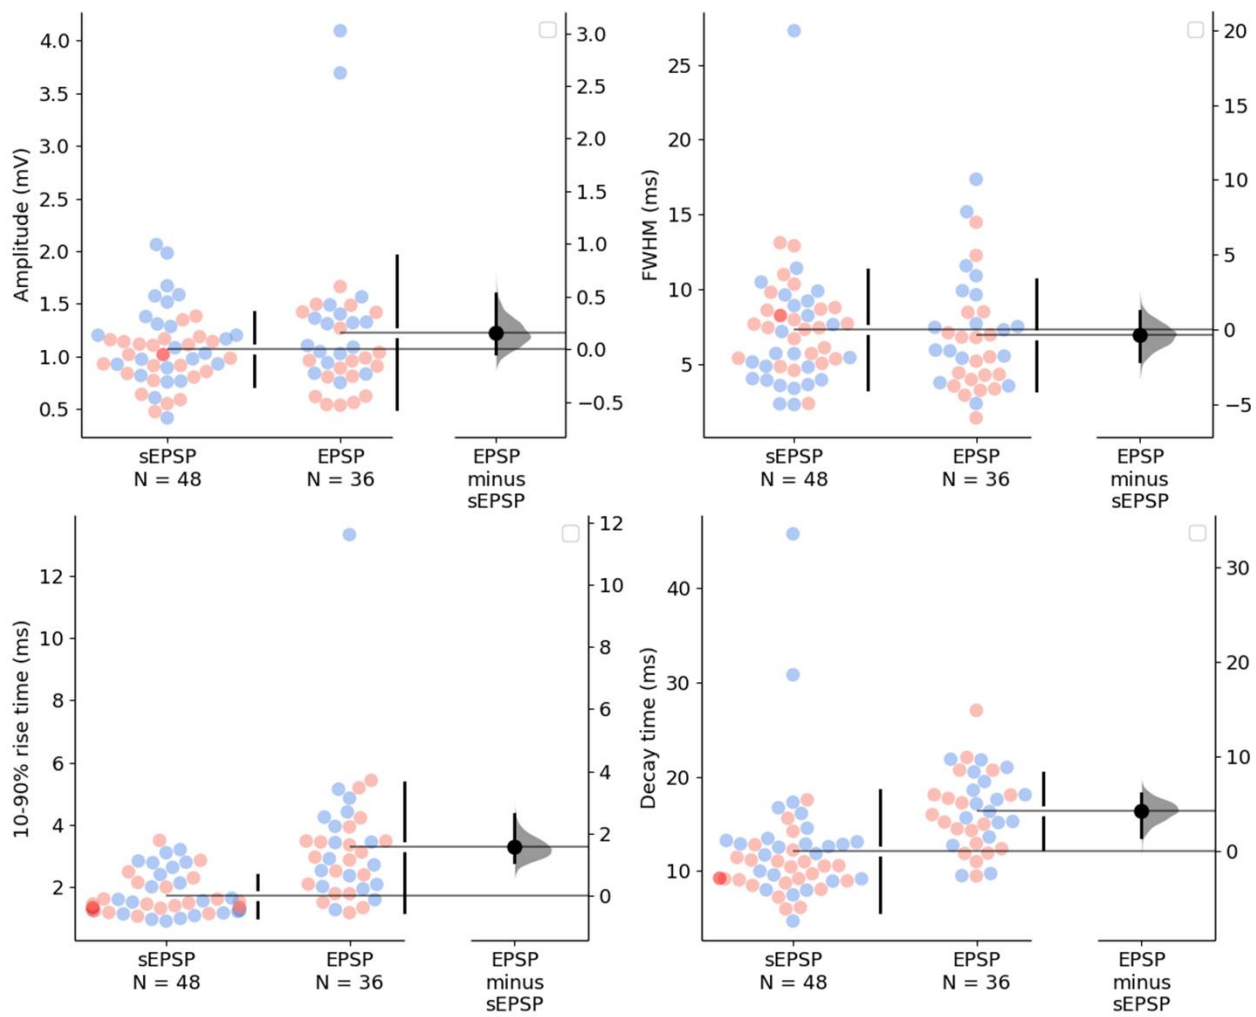

**Suppl.Fig.10.** Comparison of sEPSP and EPSP features.

Each dot represents the mean of all the recorded values on individual trials for a given cell. Blue: human, red: rat. The example cell in Figure 2 is highlighted with darker red, to give an intuition of how representative is it.

1152  
1153  
1154  
1155  
1156

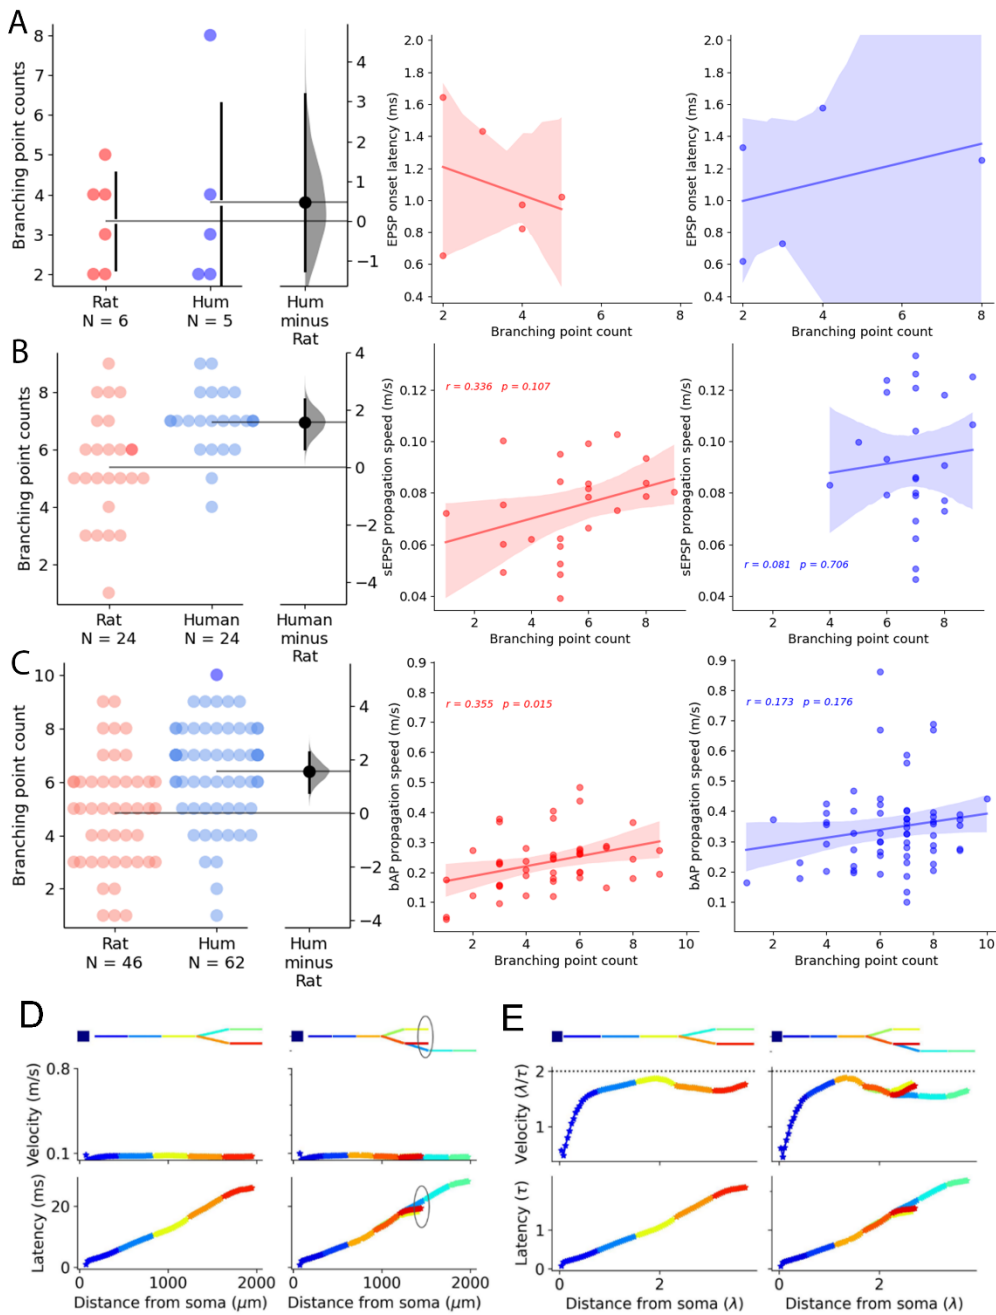

**Suppl.Fig.11. Effect of dendritic branching points on signal propagation velocity.** **A** Dendritic branching point counts between the putative synapse and the soma of the postsynaptic cells of the fully reconstructed cell pairs. We could not find significant correlation between synaptic latency and branching point counts (Red: rat, Blue: human). **B** Branching point counts between the dendritic recording site and the soma during sEPSP recordings. We could not find significant correlation between branching point count and sEPSP propagation speed. **C** Branching point counts between the dendritic recording site and the soma during bAP recordings. We found a significant correlation between branching point count and bAP propagation speed in the rat dataset (red) but not in the human dataset (blue). **D** Simulation of the effect of a branching point on the signal propagation velocity. Adding a branch point (yellow versus red, marked with a circle) to the dendrite did not affect the velocity and the latency of the simulated signal. **E** Same as D but for cable units.

1157  
1158  
1159  
1160  
1161  
1162  
1163  
1164  
1165  
1166  
1167  
1168  
1169



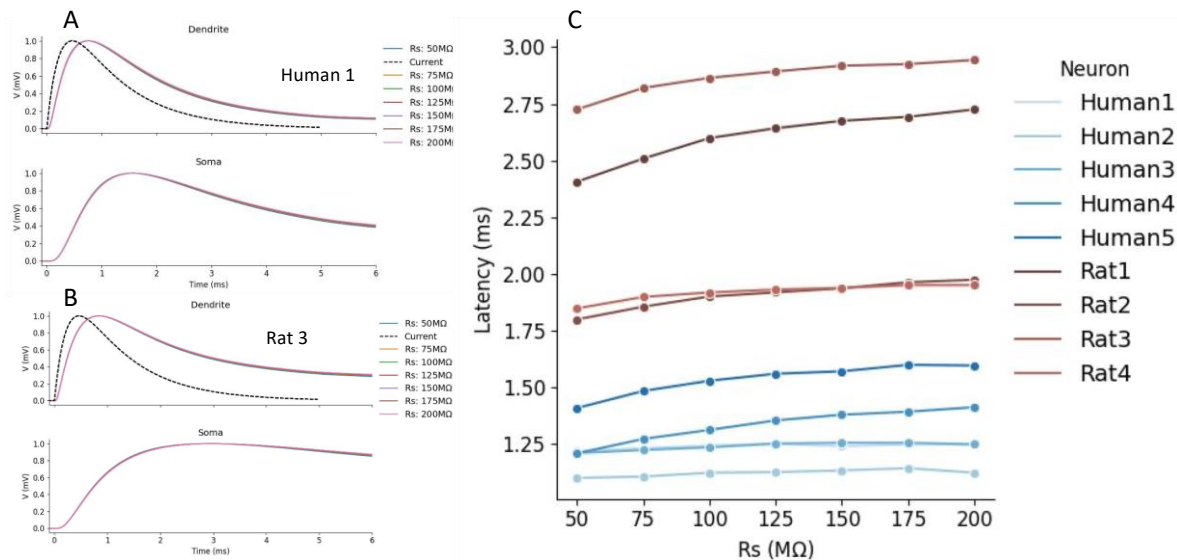

1170

1171 **Suppl.Fig.12.** Effect of series resistance of the dendritic electrode on measurement of EPSP latency. A. Top: simulated  
1172 EPSPs in Human 1 neuron as recorded at the injected point in the apical dendrite, located 150  $\mu$ m from the soma.  
1173 Simulated synaptic current is shown by the dashed line. Bottom: the resultant EPSP at the soma. Simulation was  
1174 performed for a range of series resistance ( $R_s$ ) values (shown at right). B. As in A but for Rat 3 neuron. C. EPSPs  
1175 latency as a function of  $R_s$  for the 9 modeled neurons. Electrode capacitance was 6pF with variable series resistance,  
1176  $R_s$ .

1177

1178

1179
